# Transcriptome analysis of Sézary syndrome and lymphocytic-variant hypereosinophilic syndrome T cells reveals common and divergent genes

Andrea M. Moerman-Herzog<sup>1</sup>, Daniel A. Acheampong<sup>1,2</sup>, Amanda G. Brooks<sup>1</sup>, Suzan M. Blair<sup>1</sup>, Ping-Ching Hsu<sup>3</sup> and Henry K. Wong<sup>1</sup>

<sup>1</sup>Department of Dermatology, University of Arkansas for Medical Sciences, Little Rock, Arkansas, USA

<sup>2</sup>Joint Graduate Program in Bioinformatics, University of Arkansas at Little Rock and University of Arkansas for Medical Sciences, Little Rock, Arkansas, USA

<sup>3</sup>Fay W. Boozman College of Public Health, University of Arkansas for Medical Sciences, Little Rock, Arkansas, USA

**Correspondence to:** Henry K. Wong, **email:** hkwong@uams.edu

**Keywords:** Sézary syndrome; lymphocytic-variant hypereosinophilic syndrome; biomarkers; microarrays; progression

**Received:** May 24, 2019

**Accepted:** July 15, 2019

**Published:** August 20, 2019

**Copyright:** Moerman-Herzog et al. This is an open-access article distributed under the terms of the Creative Commons Attribution License 3.0 (CC BY 3.0), which permits unrestricted use, distribution, and reproduction in any medium, provided the original author and source are credited.

## ABSTRACT

**Sézary syndrome (SS) is an aggressive cutaneous T cell lymphoma with pruritic skin inflammation and immune dysfunction, driven by neoplastic, clonal memory T cells in both peripheral blood and skin. To gain insight into abnormal gene expression promoting T cell dysfunction, lymphoproliferation and transformation in SS, we first compared functional transcriptomic profiles of both resting and activated CD4<sup>+</sup>CD45RO<sup>+</sup> T cells from SS patients and normal donors to identified differential expressed genes. Next, a meta-analysis was performed to compare our SS data to public microarray data from a novel benign disease control, lymphocytic-variant hypereosinophilic syndrome (L-HES). L-HES is a rare, clonal lymphoproliferation of abnormal memory T cells that produces similar clinical symptoms as SS, including severe pruritus and eosinophilia. Comparison revealed gene sets specific for either SS (370 genes) or L-HES (519 genes), and a subset of 163 genes that were dysregulated in both SS and L-HES T cells compared to normal donor T cells. Genes confirmed by RT-qPCR included elevated expression of *PLS3*, *TWIST1* and *TOX* only in SS, while *IL17RB* mRNA was increased only in L-HES. *CDCA7* was increased in both diseases. In an L-HES patient who progressed to peripheral T cell lymphoma, the malignant transformation identified increases in the expression of *CDCA7*, *TIGIT*, and *TOX*, which are highly expressed in SS, suggesting that these genes contribute to neoplastic transformation. In summary, we have identified gene expression biomarkers that implicate a common transformative mechanism and others that are unique to differentiate SS from L-HES.**

## INTRODUCTION

Sézary Syndrome (SS) is a rare and aggressive leukemic form of cutaneous T cell lymphoma (CTCL), characterized by pruritic erythroderma, lymphadenopathy, and leukemic T cells in the peripheral blood. The etiology of SS is unclear, but it is thought to develop from neoplastic transformation of mature CD4 T cells with Th2 bias and skin homing properties. SS can arise spontaneously, or

develop in patients with a prior diagnosis of mycosis fungoides, a more skin-tropic and indolent form of CTCL. How microenvironmental factors influence the neoplastic T cell phenotype, and whether mycosis fungoides and SS have independent origins or represent a continuum of closely related T cell neoplasms remains unclear [1, 2]. A distinct clinical precursor of SS with CD4 lymphocytosis in blood and skin has not been identified, and gene expression studies often rely on benign dermatoses (e.g. chronic

eczema, psoriasis and pityriasis rubra pilaris) for disease controls [3, 4]. Lymphocytic-variant hypereosinophilic syndrome (L-HES) also has clinical findings very similar to SS, and is derived from a benign lymphoproliferation of clonal T cells with skin and blood tropism. The persistent hypereosinophilia (AEC  $\geq 1500 \times 10^9/L$ ) of L-HES is secondary to IL-5 production by abnormal T cells [5–7], and both eosinophils and abnormal T cells are abundant in the blood and skin of L-HES patients [8–10]. Common dermatological manifestations of L-HES include pruritus, erythroderma, eczema, urticaria and angioderma [8–10]. These features make L-HES a valuable disease control for molecular studies of SS pathogenesis.

Unlike SS T cells, L-HES T cells lack cerebriform nuclei and appear largely normal, but SS and L-HES T cells share many molecular features. Like SS T cells, L-HES T cells are mature, memory T cells with a Th2 bias, and are often clonal [8, 11]. Absent or reduced expression of immunological surface markers associated with the T cell receptor complex (CD2, CD3, CD4, CD8) is common in both SS and L-HES T cells. In L-HES, the most common phenotypes are CD3<sup>+</sup>CD4<sup>+</sup> and CD3<sup>+</sup>CD4<sup>+</sup>CD8<sup>-</sup> [6]. Loss of CD7 is also common in both SS and L-HES T cells [8], while loss of CD26 appears limited to SS. L-HES typically has an indolent clinical course, and is considered a benign lymphoproliferative disorder. However, a small proportion of cases progress to full blown peripheral T cell lymphoma (PTCL) [10, 11]. Thus, SS and L-HES share a number of important features that suggest related developmental pathways.

As these T cell driven diseases share clinical and phenotypic similarities, we hypothesize that they also share a subset of similar gene expression abnormalities. Determining how gene expression in SS and L-HES differs from normal T cells and from each other may reveal genes that are potentially important to immune dysfunction, lymphoproliferation, neoplastic transformation, clinical symptoms, and unique biomarkers of each disease. Toward this purpose, we compared the functional transcriptomes of CD4<sup>+</sup>CD45RO<sup>+</sup> T cells from SS patients and normal donors (ND) using high-density oligonucleotide microarrays. To gain new insight into genes important for SS and inflammation, we then conducted a meta-analysis of our own gene expression data for SS T cells and a public gene expression data set for L-HES T cells generated with the same microarray platform [12], and obtained from the Gene Expression Omnibus. Both studies examined inducible gene expression responses to assess functional differences. Meta-analysis of the two studies revealed both common and distinct gene expression patterns between SS and L-HES. Genes important as biomarkers to distinguish SS and/or L-HES were identified. In addition, examination of longitudinal data from one L-HES patient who progressed to T-lymphoma revealed that genes differentially expressed in SS were also dysregulated during this patient's malignant clinical progression.

## RESULTS

### Functional alterations in transcriptomes of SS T cells compared to ND

Analysis of T cell transcriptomes in response to stimulation offers functional insight and temporal regulation of gene expression not available from resting static T cells. We analyzed dynamic gene expression in resting and activated CD4<sup>+</sup>CD45RO<sup>+</sup> memory T cells from three ND and three SS patients from cohort 1 (Figure 1A, Table 1, SS 1-3). Purified T cells were stimulated for 0, 2 and 6 hours with PMA+A23187, and mRNA expression was examined with high density Affymetrix HG U133 Plus 2 microarrays (Figure 1A). Comparing gene expression between resting CD4<sup>+</sup>CD45RO<sup>+</sup> memory T cells from SS and ND identified 533 differentially expressed genes (DEGs, Supplementary Figure 1A), of which 190 DEGs (307 probes) were upregulated and 343 DEGs (536 probes) were downregulated in SS. The threshold for differential expression was log<sub>2</sub> fold change (log<sub>2</sub>FC)  $\geq |1|$  and percentage of false prediction (pfp)  $< 0.05$ , determined by the RankProduct method. Genes with significantly higher expression in SS compared to ND T cells included previously identified SS biomarker genes *CDO1*, *DNM3*, *GATA3*, *NEDD4L*, *PLS3*, *TOX*, and *TWIST1* (Figure 1B) [2, 4, 13–23]. These highly expressed genes can serve as biomarkers, and may have pathogenic roles [24, 25]. Deficiencies in *DPP4*, *SATB1*, and *STAT4* gene expression were also observed in our patients, recapitulating findings from prior studies. Reduced expression of *DPP4* mRNA is consistent with the CD26<sup>-</sup> immunophenotype common to SS T cells. Biomarkers with reduced expression, such as *STAT4*, are most useful when combined with other positively expressed biomarker genes [3, 19]. Reduced expression of cytokine genes was also observed in stimulated SS T cells compared to ND (Figure 1B), confirming functional defects of SS T cells observed in our previous findings [26, 27]. Furthermore, a global deficit of functional, activation-dependent gene expression was apparent in SS T cells, with reduced amplitude of inducible gene expression compared to ND T cells (Figure 2A).

Differential expression of a subset of SS DEGs was validated by RT-qPCR (Figure 3) using PBMCs from an independent group of SS patients from cohort 1 (Table 1, SS 4-13). Significantly higher gene expression ( $p \leq 0.05$ ) was observed in PBMCs from SS patients compared to ND for *ANK1*, *CXCL13*, *KCNK1*, *GATA6*, *HDAC9*, *PLS3*, and *SGCE*, in resting PBMCs and following activation.

### Meta-analysis of SS and L-HES transcriptomes

L-HES is a benign lymphoproliferation of T cells that exhibits both skin and blood infiltration, and Th2 bias like SS. L-HES and SS have common clinical features,

but differ markedly in prognosis. We hypothesized that the clinical similarities may arise from similar gene expression profiles in the two T cell diseases, and comparing transcriptomic data for SS and L-HES T cells will provide insight into the pathogenesis of both diseases. A novel study by Ravoet, *et al.* [12] previously compared the transcriptomes of CD3<sup>-</sup>CD4<sup>+</sup> T cells from three patients with chronic L-HES to CD3<sup>+</sup>CD4<sup>+</sup> T cells from four ND (Table 2) using the HG U133 Plus 2.0 microarray platform and a similar experimental design as our SS study. In addition, the authors of this L-HES study demonstrated that the selected CD3<sup>-</sup>CD4<sup>+</sup> T cells were overwhelmingly CD45RO<sup>+</sup>, like SS T cells. The public L-HES microarray data was obtained from the Gene Expression Omnibus, and reanalyzed using the same method as our data for SS (Supplementary Figure 2). This approach yielded 682 DEGs (1221 probes) in resting T cells from L-HES patients compared to ND ( $\log_2FC \geq |1|$ ,  $pfp < 0.05$ ), of which 282 DEGs (496 probes) were upregulated and 400 DEGs (725 probes) were downregulated in L-HES (Figure 4A, Supplementary Figure 1B). Our analysis identified overexpression of *IL17RB*, *MAP3K8*, *RUNX2*, *SMAD5* and *TGFBR3*, and underexpression of *CYSLTR1*, *KIT*, *NOG*, *SMAD7*, *TGFBF1* and *TGFBF2* in L-HES T cells, as reported in the original study [12]. Significant overexpression of *GATA3* and *BATF* was also observed in resting L-HES T cells as reported previously [28].

A meta-analysis was then conducted to identify genes that were dysregulated either in SS or L-HES

alone, or in both diseases. Comparing the 533 DEGs in SS to the 682 DEGs in L-HES (Figure 4A) revealed that many DEGs were unique to SS (150 up, 220 down) or unique to L-HES (244 up, 275 down), while 163 DEGs were shared between SS and L-HES (Figure 4B). Hierarchical clustering of a subset of SS-unique and L-HES-unique DEGs with 5 fold or greater differential expression separated SS from L-HES and produced four major clusters of up and downregulated genes for each disease (Figure 4C). The heatmap shows that a subset of DEGs significantly downregulated only in L-HES T cells (compared to bulk CD4 T cells) appear to also be somewhat reduced in SS and ND memory T cells. In contrast, other genes were uniquely downregulated in L-HES (compared to SS and all ND control T cells), including *IL17RB*, which may be an L-HES biomarker, as suggested previously [12]. DEGs unique to SS included many biomarker genes identified in prior studies, including *CDO1*, *PLS3*, *STAT4*, *TOX*, and *TWIST1* (Table 3) [3, 16, 19, 29]. The lack of altered expression for these genes in L-HES supports their potential to differentiate SS from L-HES.

The 163 DEGs shared between SS and L-HES included 135 (12.5%) that were concordantly altered (e.g., increased in both, or decreased in both; Figure 4B, orange overlap), and 26 (2%) that were discordantly altered (Figure 4B, blue overlap). The degree of concordant gene expression overlap is greater than expected by chance ( $p \leq 1.027^{-173}$ ). Hierarchical clustering using all 163

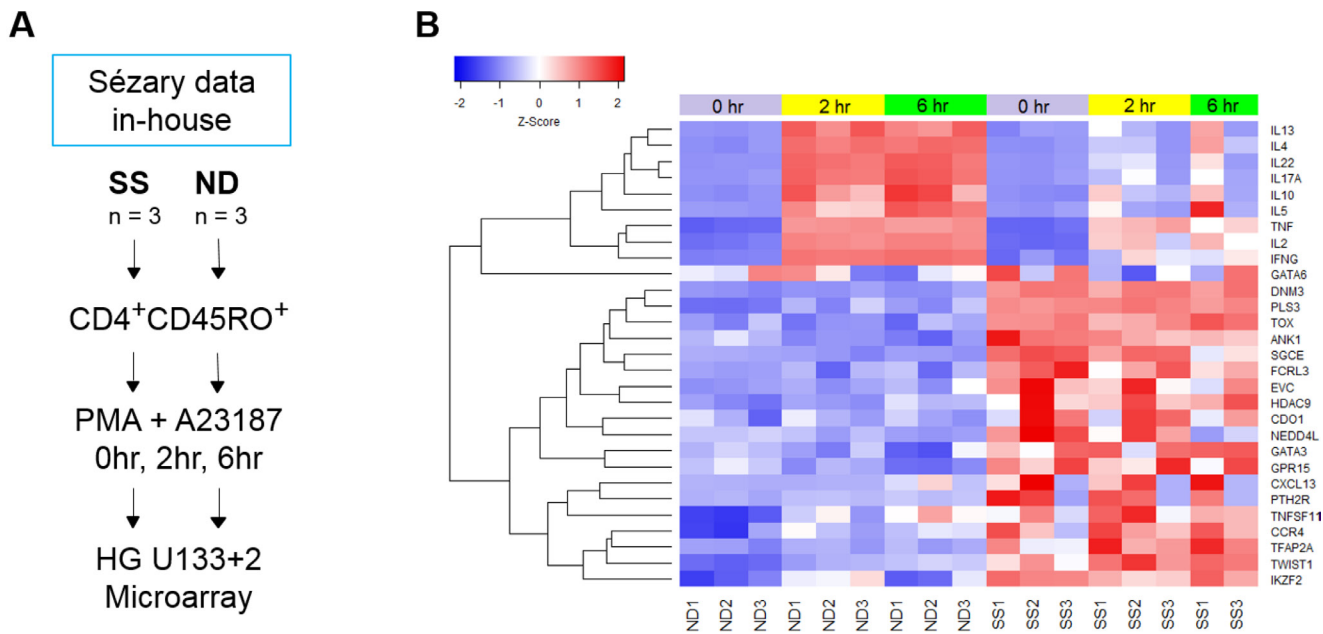

**Figure 1:** (A) Schematic of T cell populations and experimental design of the SS microarray study. CD4<sup>+</sup>CD45RO<sup>+</sup> memory T cells were isolated from SS and ND PBMC by negative selection, as described in Materials and Methods. Cells from both SS and ND were activated with PMA+A23187 for 0, 2, and 6 hours. Gene expression was examined with Affymetrix HG U133 Plus 2.0 microarrays. (B) Traditional SS biomarker genes are highly over-expressed in SS compared to ND memory T cells, with little change in expression upon activation with PMA+A23187 in both SS and ND T cells. Stimulated cytokine gene expression is lower at 2 and 6 hours in SS compared to ND. Gene expression z-score is represented by a color scale from red (high expression) to blue (low expression). Colored bars at the top of the heatmap indicate cell treatments: unstimulated (violet), 2 hour stimulated (yellow), and 6 hour stimulated (green).

**Table 1: Characteristics of Sézary syndrome patients in this study**

| Cohort 1       | CTCL Stage | Gender | Race | Age years | Sézary cells % | Sézary cells/ul |
|----------------|------------|--------|------|-----------|----------------|-----------------|
| 1 <sup>M</sup> | IVA/SS     | F      | AA   | 75        | 45             | 4860            |
| 2 <sup>M</sup> | IVB/SS     | M      | W    | 64        | 29             | 5133            |
| 3 <sup>M</sup> | IVB/SS     | F      | W    | 53        | 61             | 6588            |
| 4              | IV/SS      | M      | W    | 62        | 63             | 5697            |
| 5              | IV/SS      | F      | AA   | 66        | 1              | n.a.            |
| 6              | IV/SS      | M      | AA   | 61        | 18             | n.a.            |
| 7              | IV/SS      | F      | W    | 92        | 0              | n.a.            |
| 8              | IV/SS      | F      | W    | 70        | 16             | n.a.            |
| 9              | IV/SS      | F      | AA   | 87        | 12             | n.a.            |
| 10             | IV/SS      | M      | AA   | 66        | n.a.           | n.a.            |
| 11             | IV/SS      | M      | W    | 72        | 35             | n.a.            |
| 12             | IV/SS      | F      | W    | 74        | 9              | n.a.            |
| 13             | IV/SS      | M      | W    | 62        | n.a.           | n.a.            |

  

| Cohort 2 | CTCL Stage | Gender | Race | Age years | CD4:CD8 ratio | CD4+CD7- % | TCR clone + |
|----------|------------|--------|------|-----------|---------------|------------|-------------|
| 14       | IVB/SS     | M      | AA   | 60        | 6.6           | 25         | blood/skin  |
| 15       | IVA/SS     | M      | W    | 71        | 47            | 45         | n.d./skin   |
| 16       | IVA/SS     | M      | AA   | 53        | 22            | 13         | blood/skin  |
| 17       | IVA/SS     | M      | AA   | 59        | 48            | 33         | blood/n.d.  |
| 18       | IVB/SS     | F      | W    | 63        | 30            | 31         | blood/skin  |
| 19       | IVB/SS     | M      | W    | 60        | 29            | 11         | n.d./skin   |

<sup>M</sup>analyzed by microarray.

n.a. not available.

n.d. not determined.

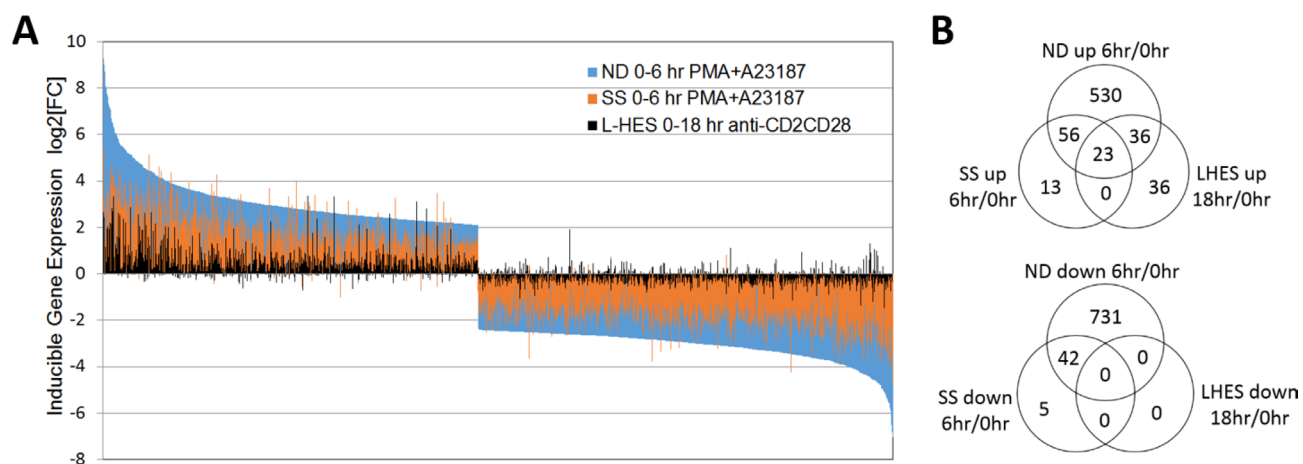

**Figure 2: (A)** Activation-dependent gene expression is globally reduced in SS compared to ND. All genes with significantly altered expression in ND are shown (blue bars), and ranked from highest to lowest relative expression vs unstimulated ND T cells. For the same genes, activation-dependent gene expression for SS is shown in orange, and L-HES in black. Gene expression log<sub>2</sub>FC in activated vs. resting T cells is represented by the direction of the bars from baseline, with increased expression above and decreased expression below zero. Each vertical bar represents an individual gene. ND (blue) and SS (orange) T cells were stimulated with PMA+A23187 for 0 or 6 hours. L-HES (black) T cells were stimulated with α-CD2CD28 and IL-2 for 0 or 18 hours. **(B)** Numbers of genes significantly up- or downregulated at the indicated time points are compared in separate Venn diagrams. Genes differentially expressed in stimulated vs. unstimulated T cells exceeded log<sub>2</sub>FC ≥ |1|, and p < 0.05. Supplementary Table 1 contains expression data for genes in each overlap category.



shared DEGs for both SS and L-HES separated the four cell populations in the two studies (SS CD4<sup>+</sup>CD45RO<sup>+</sup>, ND CD4<sup>+</sup>CD45RO<sup>+</sup>, L-HES CD3<sup>+</sup>CD4<sup>+</sup>, ND CD3<sup>+</sup>CD4<sup>+</sup>) (Figure 4D). Hierarchical clustering also separated the four major groups of shared DEGs identified in Figure 4B (Figure 4D). Concordantly downregulated genes were separated into two clusters on the heat map, and will be collectively referred to as group 4 for the remainder of this report.

Each overlap group included genes with a previously published association with SS. Group 1 included genes overexpressed in both SS and L-HES: *CCR4* [2], *CDCA7* [16, 17], *DNM3* [16, 19], *GATA3* [3, 13], *SGCE* [16, 21] and *TNFSF11* [15, 16]. Groups 2 and 3 showed discordant changes in SS and L-HES. *ANK1* [16, 18, 21], *FCRL3* [30, 31], and *IKZF2* [23, 30] were upregulated in SS and downregulated in L-HES (group 2), while *FAS* [32] was downregulated in SS and upregulated in L-HES (group 3).

Group 4 included genes with decreased expression in both diseases: *BCL2L11* [15], *NKG7* [20], *GZMA* [17], *GZMK* [17, 20], *PLAC8* [17], *SATB1*, *SMAD7*, and *TGFBR2* [15, 17]. Group 4 also included several genes previously reported to be downregulated in L-HES, including *CYSLTR1*, *KIT*, *SMAD7*, *TGFBR1*, and *TGFBR2* [12]. DEGs shared by SS and L-HES may be involved in disease mechanisms common to both diseases, and cannot distinguish L-HES from SS.

The L-HES study used  $\alpha$ -CD2CD28 and IL-2 (18 hours) for activation rather than the T cell receptor since CD3 was absent [12]. Only 95 genes were significantly upregulated, and no genes were significantly downregulated in activated vs. resting L-HES T cells (Figure 2B). In general, the largest changes in gene expression amplitude were observed in ND T cells, followed by SS T cells. L-HES showed the smallest changes following stimulation (Figure 2A). The L-HES

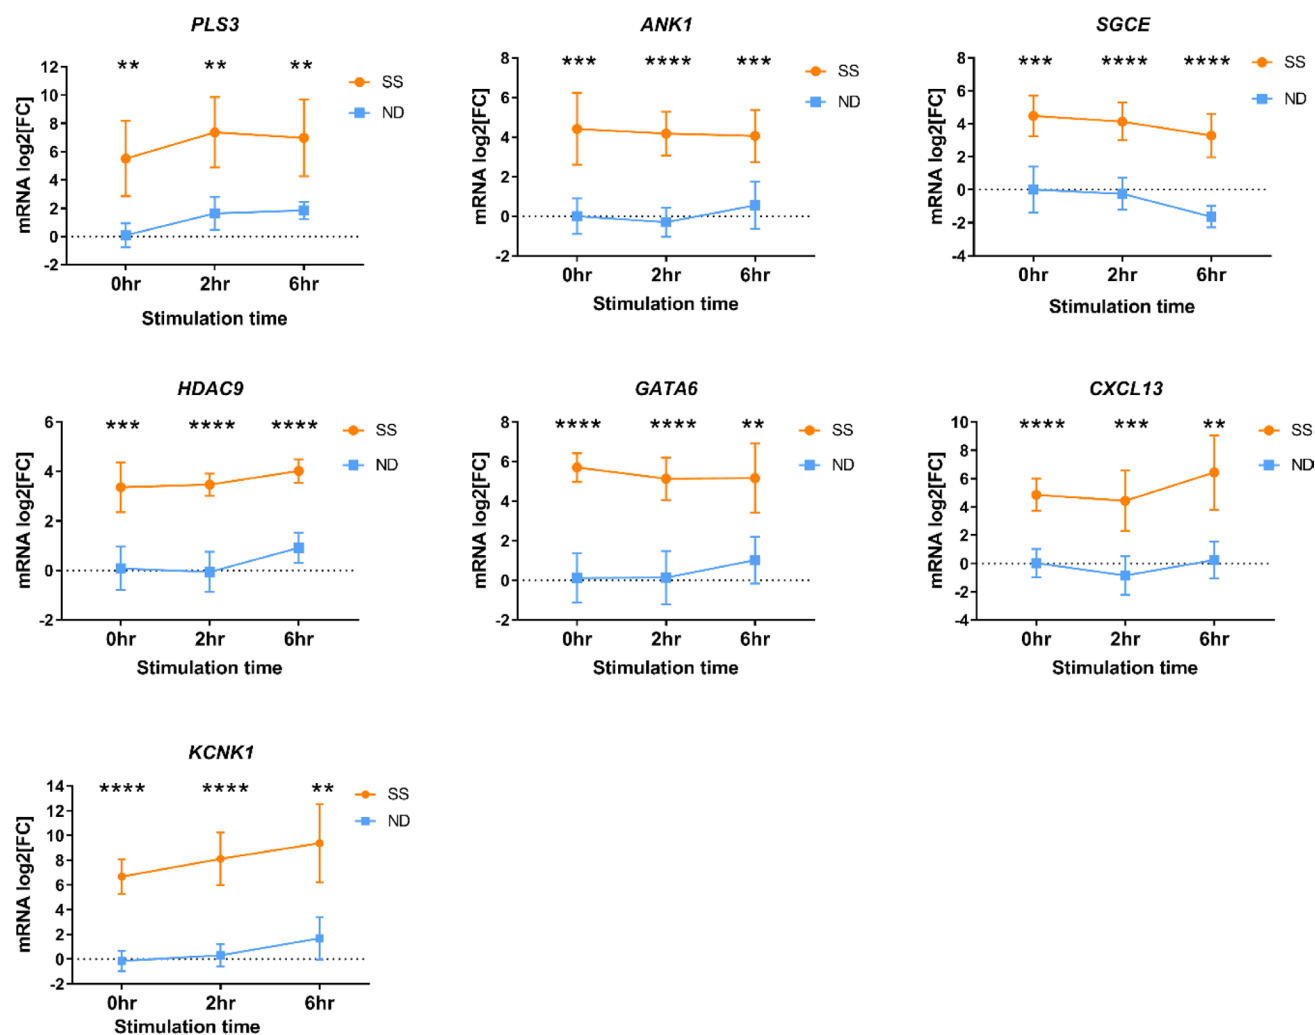

**Figure 3: Differential gene expression measured by RT-qPCR in PBMCs from an independent group of SS patients (orange circles) and ND (blue squares) from cohort 1.** PBMCs were stimulated with PMA+A23187 for 0, 2 and 6 hours. Differential gene expression is shown as the mean relative normalized mRNA level (mRNA log<sub>2</sub>[FC]) for 10-11 ND and 8-10 SS not represented by microarray data. Error bars represent 95% confidence intervals. \* $P < 0.05$ , \*\* $P < 0.01$ , \*\*\* $P < 0.001$ , \*\*\*\* $P < 0.0001$  by 2-way ANOVA with Sidak's post-test.

**Table 2: Summary of the L-HES microarray study**

|                           |                                                |
|---------------------------|------------------------------------------------|
| GEO accession number      | GSE12079                                       |
| Citation                  | Ravoet, <i>et al.</i> (2009)                   |
| L-HES T cells             | $n = 3$ , CD3 <sup>+</sup> CD4 <sup>+</sup>    |
| ND T cells                | $n = 4$ , CD3 <sup>+</sup> CD4 <sup>+</sup>    |
| Progression to T-lymphoma | Patient 1 only, year 6                         |
| Activation method         | $\alpha$ -CD2CD28 + IL-2, 18 hours, L-HES only |
| Microarray platform       | Affymetrix HG U133+2                           |

study did not include  $\alpha$ -CD2CD28-activated ND T cells, so it is unclear whether the lower activation of gene expression observed in L-HES result from suboptimal stimulation or intrinsic differences in cell phenotype, such as the loss of CD3 surface expression in L-HES T cells. In other studies, PMA+ionomycin and  $\alpha$ -CD3CD28 beads yielded strikingly similar gene expression programs in T cells when examined with high density microarrays [33]. PMA+ionomycin and combinations of  $\alpha$ -CD2CD28 or  $\alpha$ -CD3CD28 also produce very similar increases in [<sup>3</sup>H] thymidine incorporation, but have more variable effects on chemokine production [34]. A recent study using PMA+ionomycin to activate L-HES T cells evoked larger increases in IL4, IL5 and IL13 mRNAs in L-HES T cells compared to control memory T cells [28]. This suggests that the lower induction of Th2 cytokine genes observed in the L-HES dataset is a result of the stimulation method,

and not from an inability to activate these genes in L-HES T cells.

Due to the different activation methods used in the two studies, our analysis focused only on whether a gene met the significance threshold of  $p_{\text{adj}} \leq 0.05$  for changes that exceeded 2-fold, and the direction of change, instead of comparing fold change amplitude. When lists of activated DEGs were compared between ND, SS, and L-HES, 23 genes were up-regulated in all three cell types (Figure 2B, Supplementary Table 1), including cytokines/chemokines (*IFNG*, *IL2*, *IL4*, *IL5*, *TNF*), transcription factors (*EGR1*, *EGR2*, *EGR3*, *IRF4*), and apoptosis/survival regulators (*PHLDA1*, *PMAIP1*, *SGKI*). In addition, 13 genes were significantly upregulated, and 5 genes were significantly downregulated only in SS (Figure 2B, Supplementary Table 1). *RND3*, *PIP5K1B*, and *SAMD5* increased by approximately 8

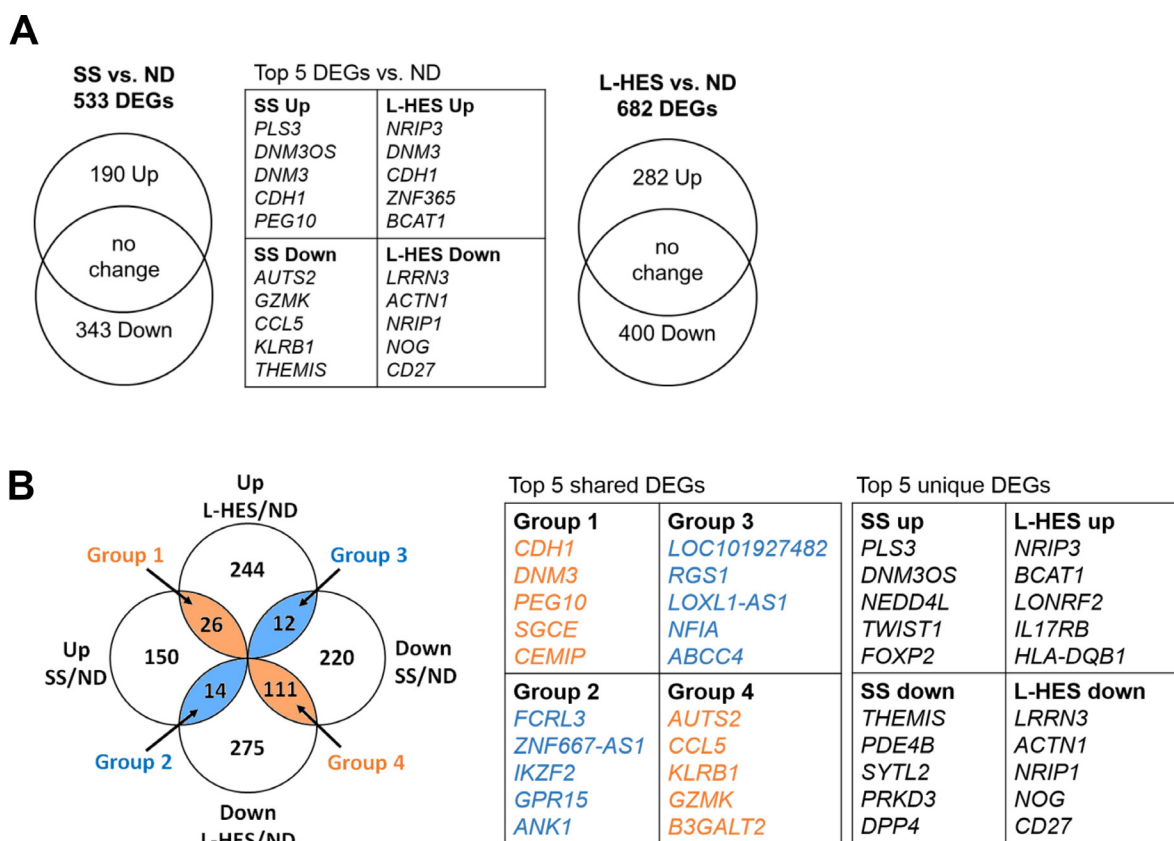

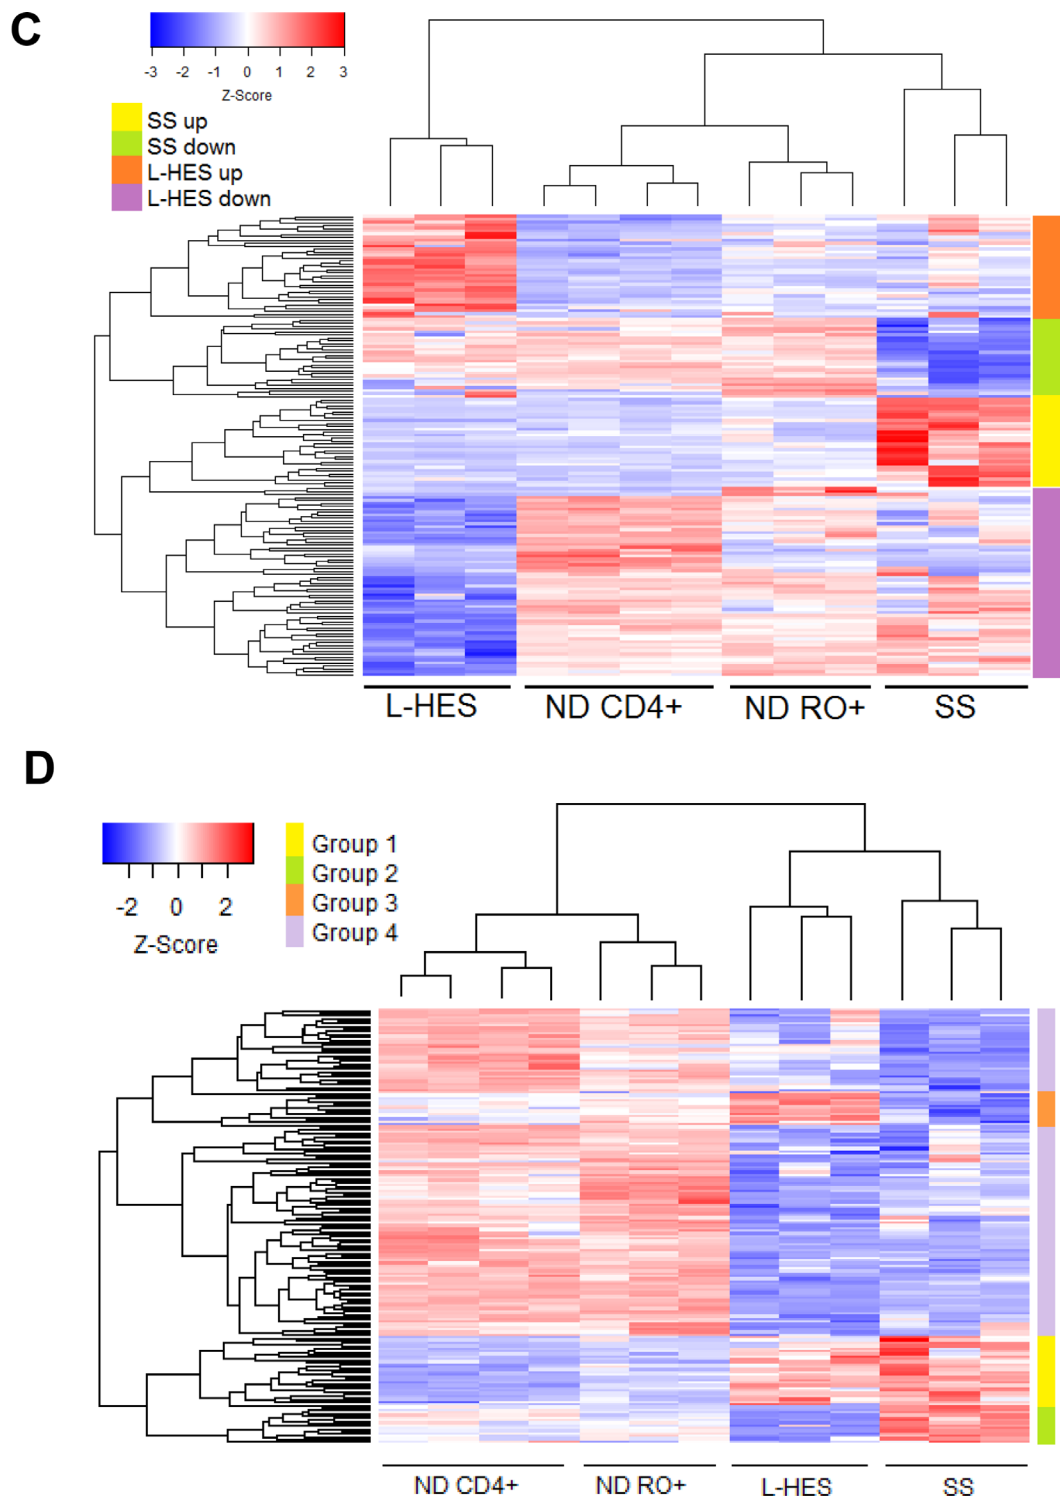

**Figure 4: Meta-analysis of DEGs in SS and L-HES T cells.** (A) Venn diagrams show the numbers of DEGs that were upregulated and downregulated in resting T cells from SS vs. ND, and L-HES vs. ND. (B) Groups of up- and downregulated DEGs for SS and L-HES from panel A were compared to each other using GeneVenn, and 163 shared DEGs were found. Concordantly changed DEGs are shown in orange overlap regions of the Venn diagram, and discordantly changed DEGs are shown in blue overlap regions. DEGs that were not shared between SS and L-HES are in the excluded white areas: 150 upregulated and 220 downregulated DEGs were unique to SS, and 247 upregulated and 276 downregulated DEGs were unique to L-HES. (C) Heatmap showing DEGs unique to SS or L-HES as distinct clusters. Genes with a 5-fold or greater mean change in gene expression are shown (Supplementary Tables 2 and 3). (D) Heat map showing four major groups of shared DEGs as distinct clusters (Supplementary Table 4). (C, D) Colored bars to the right of each heat map indicate groups of DEGs, as indicated by the color key in each panel. Gene expression is represented by a z-score color scale from red (high expression) to blue (low expression).

**Table 3: SS biomarker genes abnormally expressed in SS T cells, but not L-HES T cells**

| Gene Symbols | Sézary |          | L-HES  |          | Sézary Citations |
|--------------|--------|----------|--------|----------|------------------|
|              | log2FC | pfp      | log2FC | pfp      |                  |
| PLS3         | 7.04   | 1.21E-09 | -0.34  | 8.64E-01 | [13, 14, 16]     |
| NEDD4L       | 3.93   | 7.77E-05 | -0.72  | 2.51E-01 | [16, 17]         |
| TWIST1       | 3.81   | 1.07E-04 | 0.05   | 1.06E+00 | [15–17]          |
| PTH2R        | 3.18   | 3.28E-03 | -0.16  | 1.10E+00 | [21]             |
| CDO1         | 3.13   | 9.80E-04 | -0.71  | 1.87E-01 | [16, 19, 21]     |
| HDAC9        | 3.12   | 5.66E-04 | -0.31  | 9.06E-01 | [23, 68]         |
| CXCL13       | 2.86   | 2.76E-03 | 0.11   | 1.06E+00 | [69]             |
| TOX          | 2.60   | 1.47E-03 | 0.28   | 1.02E+00 | [4, 16, 17, 23]  |
| GATA6        | 2.52   | 2.47E-03 | -0.15  | 1.15E+00 | [70, 71]         |
| KLF8         | 2.24   | 3.34E-03 | -0.82  | 2.41E-01 | [17, 23]         |
| TIGIT        | 1.60   | 1.59E-02 | 0.26   | 8.23E-01 | [16, 23, 30]     |
| STAT4        | -3.35  | 9.72E-05 | -0.37  | 7.88E-01 | [13, 15, 17]     |
| DPP4         | -3.36  | 9.73E-05 | 0.32   | 6.99E-01 | [13, 15]         |

The RankProd log2FC and pfp for each gene is presented for both diseases. For each gene, citations are provided for prior reports of differential gene expression in SS.

log2FC, log2 fold change.

pfp, percentage of false positives determined by RankProd.

**Table 4: Summary of L-HES patient characteristics for this study**

| Characteristic            | Peripheral blood     | Bone marrow |
|---------------------------|----------------------|-------------|
| CD3–CD4+ cells            | 40%                  | 23%         |
| Absolute eosinophil count | $2.6 \times 10^9/L$  | n.d.        |
| Absolute lymphocyte count | $12.6 \times 10^9/L$ | n.d.        |
| Cytogenetic abnormalities | n.d.                 | normal      |
| Gene rearrangements       | n.d.                 | normal      |
| TCRB clonality            | n.d.                 | positive    |

n.d., not determined.

fold in SS, but remained unchanged in ND and L-HES (Supplementary Table 1). By comparison, 36 genes were significantly upregulated only in L-HES, including *BCL2*, *FLT3LG* and *IL17RB* (Figure 2B, Supplementary Table 1). Interestingly, *FLT3LG* was significantly downregulated in ND T cells.

Gene expression changes were confirmed by RT-qPCR using PBMCs from an independent group of SS and ND from cohort 2 (Table 1, SS 14-19), and one additional L-HES patient (described in Materials and Methods, and summarized in Table 4). Results presented in Figure 5 support the concordant upregulation of the group 1 gene *CDCA7* in both SS and L-HES. The SS biomarker gene *DNM3* was only slightly elevated in this L-HES patient. Other group 1 genes *GATA3* and *TNFSF11* were upregulated in L-HES PBMCs but were not significantly elevated in SS. The group 2 gene *ANK1* showed significantly increased expression in SS PBMCs, and decreased expression was observed in the L-HES

patient PBMCs following stimulation. The group 4 gene *SMAD7* showed significantly decreased expression in SS compared to ND, but decreased expression could not be confirmed in the L-HES patient PBMCs.

SS biomarker genes *PLS3*, *TOX* and *TWIST1* were not highly expressed in the L-HES microarray data compared to ND, and our RT-qPCR results from an independent L-HES patient corroborated low expression of *PLS3*, *TOX* and *TWIST1* (Figure 5). Microarray data also showed increased expression of *IL17RB* and *MAP3K8* in L-HES but not SS. *IL17RB* expression was not altered in SS PBMCs, but was elevated in L-HES PBMCs compared to ND (Figure 5). *MAP3K8* expression was significantly reduced in SS compared to ND, but the previously reported increased expression in L-HES could not be confirmed in PBMCs from this L-HES patient. Finally, *IFNG* expression was significantly reduced in SS PBMCs compared to ND, and results from the L-HES patient were intermediate at all time points.



## Biological process enrichment analysis

To reveal functional associations in the dysregulated genes of SS and L-HES, three gene lists for SS DEGs, L-HES DEGs, and shared DEGs were compared to annotated Hallmark gene sets from the Molecular Signatures Database (MSigDB) [35, 36], and overlapping genes were identified. The top ten Hallmark gene sets enriched by shared DEGs are presented in Table 5.

The *IL-2* *STAT5* signaling and *Inflammatory Response* gene sets were enriched with both up- and down-regulated genes from both SS and L-HES DEG lists. However, all other gene sets lacked enrichment of up- or downregulated genes in one of the diseases. Five gene sets (*Apoptosis*, *Complement*, *Allograft Rejection*, *Interferon Gamma Response*, and *TNF $\alpha$  signaling via NF- $\kappa$ B*) were significantly enriched with both up- and downregulated genes in L-HES, but only downregulated

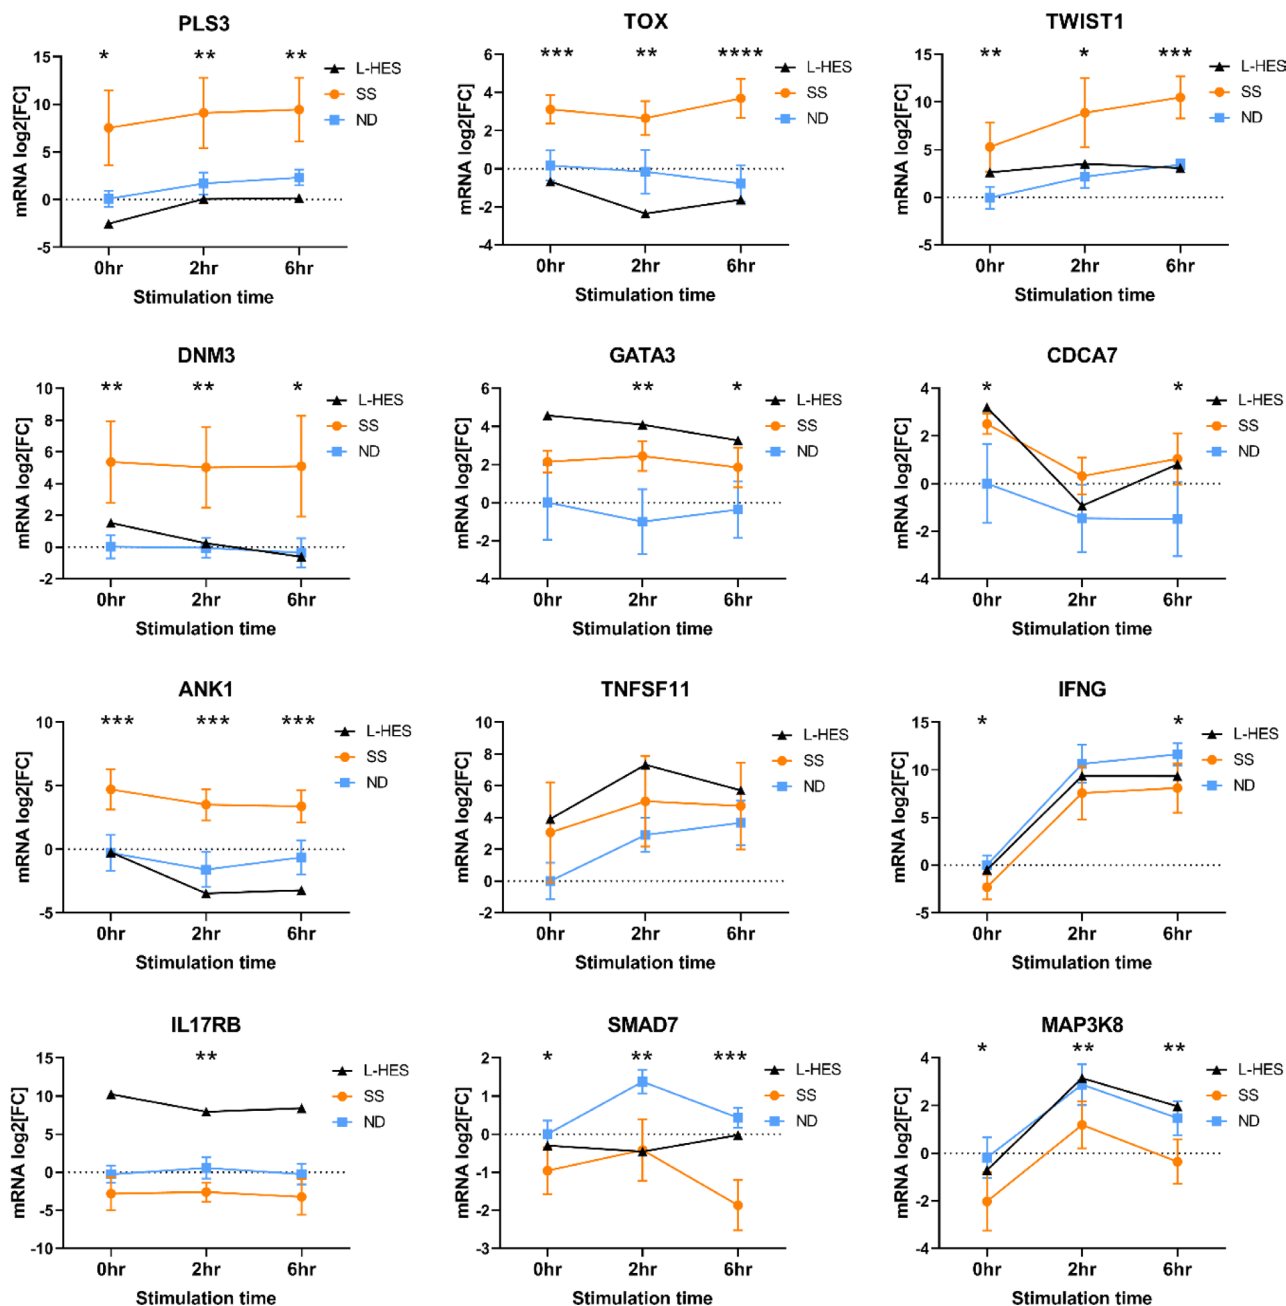

**Figure 5: Validation of relative mRNA expression in SS and ND PBMCs from cohort 2, and an additional L-HES patient.** PBMCs were stimulated with PMA+A23187 for 0, 2 and 6 hours. Differential gene expression is shown as the mean relative normalized mRNA level (mRNA log<sub>2</sub>FC) for 6 ND (blue squares) and 6 SS (orange circles) from cohort 2. L-HES data is from a single new patient. Error bars represent 95% confidence intervals. For SS vs. ND, \* $P < 0.05$ , \*\* $P < 0.01$ , \*\*\* $P < 0.001$ , \*\*\*\* $P < 0.0001$  by 2-way ANOVA with Sidak's post-test.

**Table 5: Overlap of SS DEGs, L-HES DEGs, and shared DEGs with MSigDB Hallmark gene sets**

| Hallmark biological process | Shared DEGs | SS DEGs  |          | L-HES DEGs |          |
|-----------------------------|-------------|----------|----------|------------|----------|
|                             |             | Up       | Down     | Up         | Down     |
| IL-2 STAT5 Signaling        | 8.66E-13    | 5.39E-04 | 6.59E-19 | 5.13E-07   | 4E-14    |
| Apoptosis                   | 1.70E-07    | n.s.     | 2.47E-07 | 3.78E-06   | 6.97E-06 |
| Complement                  | 7.78E-06    | n.s.     | 3.76E-12 | 1.8E-02    | 1.46E-08 |
| Inflammatory Response       | 7.78E-06    | 3.26E-02 | 3.34E-09 | 1.14E-04   | 1.46E-08 |
| Allograft Rejection         | 6.39E-05    | n.s.     | 4.07E-13 | 2.86E-06   | 2.59E-09 |
| Interferon Gamma Response   | 6.39E-05    | n.s.     | 3.34E-09 | 1.66E-05   | 2.59E-09 |
| TGFβ Signaling              | 2.93E-04    | 7.58E-03 | 1.53E-05 | n.s.       | 3.51E-03 |
| KRAS Signaling Up           | 4.56E-04    | 7.76E-03 | 2.89E-08 | n.s.       | 4.51E-03 |
| TNFα Signaling via NF-κB    | 4.56E-04    | n.s.     | 3.34E-09 | 1.66E-05   | 4.28E-11 |
| IL-6 JAK STAT3 Signaling    | 1.32E-03    | 3.44E-03 | 1.01E-02 | 5.97E-05   | n.s.     |

The top ten Hallmark gene sets that showed significant overlap with the 163 DEGs shared between SS and L-HES are listed. MSigDB overlap FDR  $q$ -values  $\leq 0.05$  are compared between groups of DEGs (n.s., not significant). SS DEG and L-HES DEG categories include all up- or downregulated genes exceeding  $\log_2FC \geq |1|$  and RankProd  $pfp \leq 0.05$ .

genes in SS. Conversely, two Hallmark gene sets (*TGFβ Signaling*, *KRAS Signaling Up*) were significantly enriched with both up- and downregulated genes in SS, but only downregulated genes in L-HES. Figure 6 shows the genes that contribute to partially overlapping functional enrichment for the *Apoptosis* gene set. Except for the notable loss of *FAS* expression in SS, concordantly downregulated genes account for almost all of the overlap in this gene set. Additional non-shared DEGs unique to SS or L-HES suggest that apoptotic function is also altered in distinct ways in each disease.

### Malignant clinical progression of L-HES was associated with progressive change in SS genes

L-HES patients are susceptible to progressing to peripheral T cell lymphoma (PTCL) (5–25% of cases), but detecting this transition can be challenging [10, 11]. The L-HES microarray study described one patient who developed malignant transformation from chronic L-HES in years 0–4 to an aggressive PTCL in year 6 of follow up [12]. We therefore determined if there were gene expression trends during the malignant clinical progression of L-HES patient 1 (LP1) that overlapped with SS gene expression. We compared all 533 SS DEGs (Figure 4A) to LP1 gene expression changes that exceeded 2-fold between years 0–4 (chronic L-HES) and year 6 (PTCL) of follow up. This yielded nine genes that increased and ten genes that decreased during LP1 progression, and mimicked SS gene expression (Supplementary Table 5). Genes altered during LP1 progression in opposition to SS gene expression were excluded. *CDC47* and *CRNDE* were over-expressed in both SS and L-HES by more than 2-fold between years 0-6. *CDC47* increased progressively, while *CRNDE* increased only in year 6 (Figure 7). The SS biomarker genes *TIGIT* and *TOX* were overexpressed

in SS, and increased progressively between years 0-6 during transformation to PTCL. The largest decrease was for *SKIL*, between years 4-6. *SKIL* was significantly downregulated in SS, but not in L-HES. In summary, a subset of genes were identified that changed during LP1 malignant progression to become more SS-like.

## DISCUSSION

SS arises from the malignant transformation of skin homing memory T cells with Th2 bias, while L-HES is a benign lymphoproliferation of phenotypically similar T cells. We present the first comparison of differential gene expression in SS and L-HES to gain insight into these two similar diseases arising from memory T cells. From this novel approach, we identified (1) concordant gene expression that suggests related etiologies produce similarities in abnormal T cell phenotypes and clinical symptoms, (2) gene expression that is abnormal in both diseases but also discordant, and (3) gene expression unique to SS or L-HES (Figure 8). The discordant and unique DEGs may reflect differences important to malignancy, and can differentiate SS and L-HES. Finally, SS-like gene expression was observed to increase during progression of chronic L-HES to PTCL.

Higher expression of *ANK1*, *PLS3*, *TOX* and *TWIST1* in SS compared to ND and L-HES was confirmed in additional patients to support their value as biomarkers for SS. Overexpression of these genes may serve pro-oncogenic roles limited to SS and PTCL, such as apoptosis resistance attributed to *PLS3* [37], and *TOX*-dependent repression of cyclin-dependent kinase inhibitors [25]. Several potential SS biomarker genes (*ANK1*, *CXCL13*, *GATA6*, *HDAC9*, *KCNK1*, *PLS3*, *SGCE*, *TWIST1*) maintained significantly higher expression in SS compared

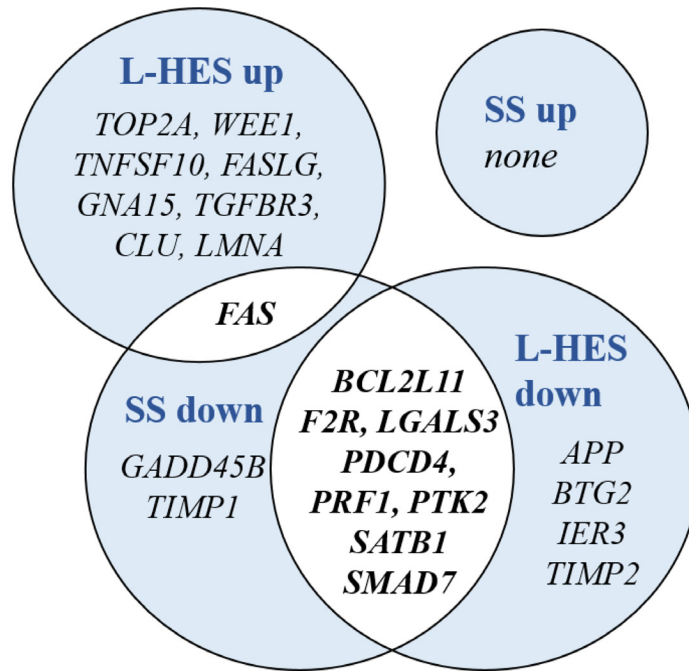

**Figure 6: DEGs shared between SS and L-HES are enriched in the Hallmark gene set for apoptosis.** Groups of up- and downregulated DEGs from SS and L-HES are depicted by overlapping circles. Gene symbols in overlapped areas with white background were dysregulated in both SS and L-HES, while gene symbols in areas with blue background were dysregulated only in SS or L-HES.

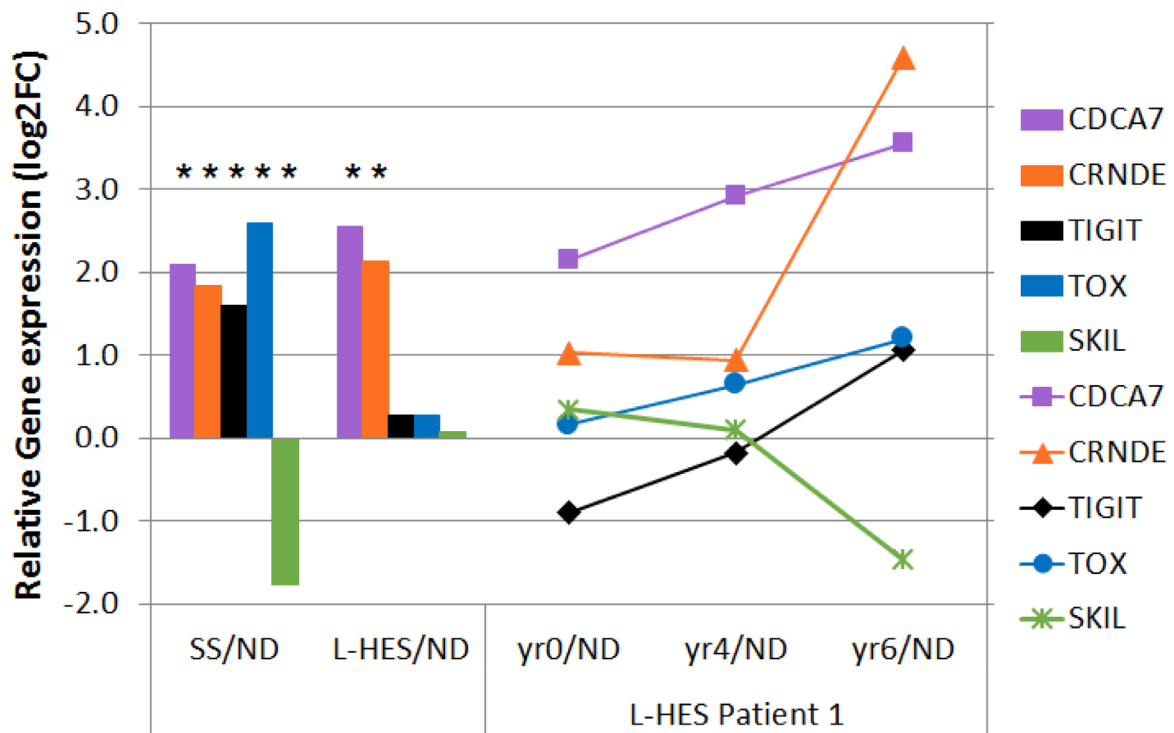

**Figure 7: Disease progression in LP1 shows SS-like gene expression changes.** Gene expression that changed more than 2 fold between year 0 (chronic L-HES) and year 6 (PTCL) in LP1 is shown for *CDCA7*, *CRNDE*, *TIGIT*, *TOX*, and *SKIL*. Line plots to the right show relative gene expression for LP1 years 0–6 compared to ND. Bar plots to the left show relative gene expression log2FC for all SS/ND and all L-HES(yr 0)/ND. Asterisks indicate significant results (pfp < 0.05, cases vs. controls).

to ND in both resting and activated T cells, indicating that T cell activation would not diminish the ability of these genes to distinguish SS from ND. Gene expression unique to L-HES may also help distinguish these two clinically similar diseases. *IL17RB*, *MAP3K8*, *RUNX2*, *SMAD5* and *TGFBR3* were overexpressed only in L-HES, and increased *IL17RB* expression was confirmed in an L-HES patient in this study. Monitoring the expression of these genes may be helpful in excluding SS, and avoiding lymphoma therapies for L-HES patients.

A subset of 163 DEGs dysregulated in both SS and L-HES was also identified, and divided into four major groups based on the relationship of altered gene expression in the two diseases. Importantly, genes previously associated with SS were found to be concordantly dysregulated in both SS and L-HES, indicating that these genes are not specific biomarkers for neoplastic T cells in SS, and may have related functions in both diseases. The concordant overexpression of the “SS genes” *CCR4*, *DNM3*, *GATA3* and *TNFSF11* in both SS and L-HES (group 1) suggests common roles important to lymphocytosis, Th2 bias, and skin homing, and may be useful for classifying similar T-lymphoproliferations. *DNM3* has clinical implication in SS, as higher *DNM3* expression in 64 patients was associated with greater overall survival [19]. Elevated expression of *DNM3* in chronic L-HES is consistent with its proposed function as a tumor suppressor [38, 39]. The chemokine receptor *CCR4* is essential for cutaneous homing of helper T cells associated with Th2-mediated pathology, and is the target

of mogamulizumab, a monoclonal antibody clinically effective in SS (47% overall response rate) [40].

Group 1 also identified two genes with known pro-oncogenic roles without prior association with SS: *CDCA7*, and *CRNDE*. *CDCA7* overexpression has been linked to progression of chronic myelogenous leukemia to blast crisis [41], and its encoded protein, JPO1, is a direct target of c-myc [42]. *CRNDE* expression is up-regulated in many solid tumors and leukemias, and is associated with a stemness signature [43].

Concordantly downregulated genes in group 4 formed the largest category of shared DEGs in SS and L-HES. Many genes involved in Th1 (*IL18R1*, *IL18RAP*, *STAT4*), Th17 (*CCL20*, *CCR6*, *IL23A*), and effector (*EOMES*, *GZMA*, *GZMH*, *GZMK*) functions were underexpressed in both SS and L-HES T cells relative to ND T cells, reflecting Th2 lymphocytosis. Reduced *SATB1* expression may contribute to Th2 bias and proliferation in both SS and L-HES T cells. In CTCL cell lines, *SATB1* represses *IL5* expression by displacing *GATA3* from the *IL5* promoter [44]. Restoration of *SATB1* expression increased apoptosis in a SS cell line, suggesting that *SATB1* deficiency may also promote apoptosis resistance in SS [17]. Thus, reduced *SATB1* expression in SS and L-HES may facilitate both eosinophilia and enhanced T cell proliferation.

Of the 163 genes that were differentially expressed in both SS and L-HES, 26 exhibited discordant differential expression. These included *FCRL3* and *ANK1*, which were high in SS and low in L-HES. Elevated *FCRL3*

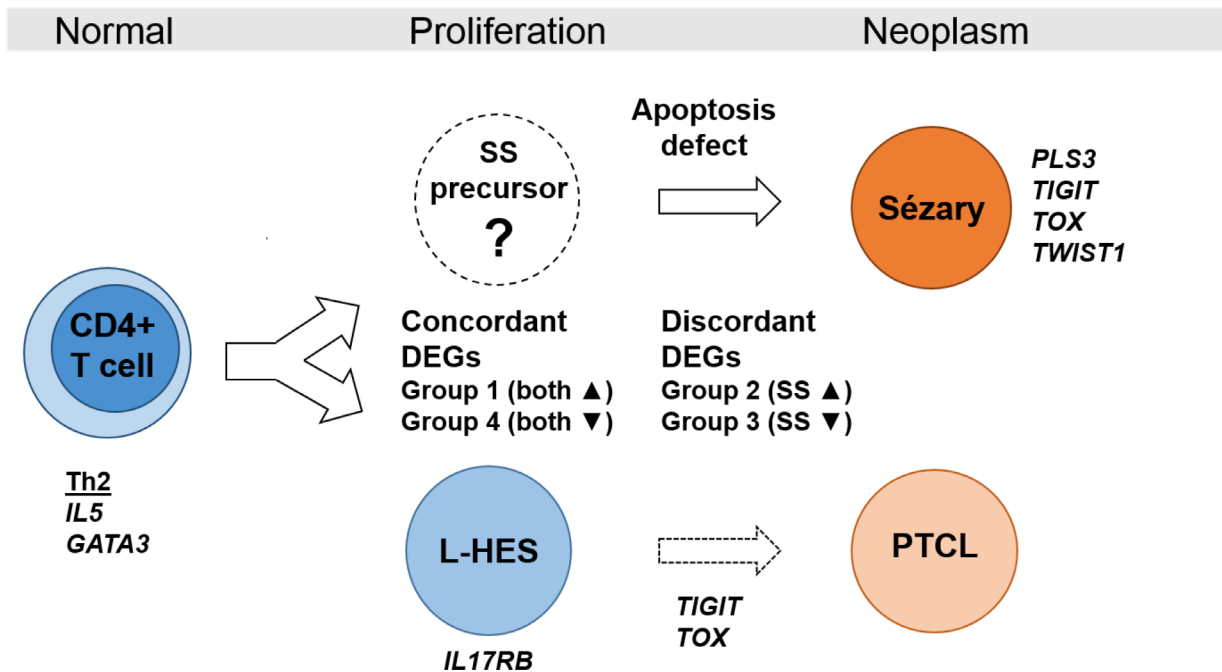

**Figure 8: Model of gene expression in benign and neoplastic T cell lymphoproliferations.** Clinical similarities and highly concordant gene expression in SS and L-HES suggest related etiologies. Concordant DEGs reflect the shared lymphocytosis and Th2 bias, while discordant DEGs and unique DEGs like *IL17RB* for L-HES and *PLS3* for SS highlight differences related to the neoplastic state in SS. Progression of chronic L-HES to PTCL was associated with increased expression of the SS genes *TIGIT* and *TOX*.



expression has been described in CD4<sup>+</sup>CD164<sup>+</sup> T cells in SS [22, 31]. Increased *ANK1* expression in SS was validated for the first time in this study, and we confirmed that *ANK1* expression remained higher in SS compared to L-HES. Interestingly, *ANK1* harbors *miR-486*, which is overexpressed and involved in cell survival in SS [45]. Along with DEGs unique to SS or L-HES, discordant DEGs likely represent the divergent development of features such as malignancy.

Gene expression following cell activation was markedly different in SS, ND and L-HES. While we detected a core group of 23 genes that were significantly induced in all three cell types, the amplitude of inducible gene expression was globally reduced in SS compared to ND. Hampered inducible cytokine expression in SS was consistent with prior reports [26, 27], but the globally reduced amplitude of altered gene expression in SS in response to PMA+A23187 stimulation suggests that signaling defects in SS may not be limited to the T cell receptor complex. Activated L-HES T cells often produce more IL-5 than similarly activated normal T cells [11, 28]. Unfortunately, stimulation with  $\alpha$ -CD2CD28 and IL-2 appeared to poorly activate L-HES T cells, as IL5 and other Th2 cytokines were not robustly activated, and this prevented useful comparisons outside of the most responsive genes.

Dysregulated gene expression in SS and L-HES was enriched with genes related to immune effector functions and apoptosis, including both upregulated and downregulated genes in L-HES, but only downregulated genes in SS. This is consistent with defects in immune function and apoptosis described for SS T cells [17, 46–48]. The *Apoptosis* gene set shared eight concordantly downregulated DEGs in SS and L-HES, including *BCL2L11*, *F2R*, *LGALS3*, *PDCD4*, *PRF1*, *PTK2*, *SATB1*, and *SMAD7*. *SMAD7* downregulation has been previously described in both SS and L-HES [12, 15], while downregulation of *BCL2L11* and *SATB1* has been described only in SS [15, 17]. Discordant differential expression of *FAS* in SS and L-HES is consistent with their malignant and benign T cell phenotypes, respectively. In addition, the enrichment of upregulated genes in L-HES but not SS suggests that dysregulation of apoptotic pathways may also differentiate SS from L-HES.

Importantly, microarray data for the progression of L-HES patient LP1 from chronic L-HES to PTCL allowed assessment of genes with potential roles in malignancy. We assessed whether conversion of L-HES T cells to a malignant phenotype would be associated with the adoption of gene expression changes that resemble SS. The group 1 pro-oncogenes *CDCA7* and *CRNDE* were upregulated in both SS and L-HES, and both continued to rise during LP1 progression. Notably, the SS biomarker genes *TIGIT* and *TOX*, which were not significantly altered in chronic L-HES, increased at least two fold during LP1 progression. *TIGIT* is a co-inhibitory immunoreceptor, and

SS patients with high *TIGIT* expression on CD4<sup>+</sup> T cells also show high CD26 negativity [30]. *TOX* is one of the most studied biomarker genes for SS and CTCL [49–51], and high *TOX* transcript levels correlated with increased disease-specific mortality in SS [25].

In conclusion, comparison of SS and L-HES identified unique DEGs to differentiate SS from L-HES. Genes previously seen in SS such as *CCR4*, *GATA3*, and *TNFSF11*, but concordantly altered in SS and L-HES suggests common roles important in inflammation, lymphomagenesis and proliferation. *ANK1* and *CDCA7* are promising new biomarkers that have previously received little or no attention in SS. This is also the first time that increased expression of the SS biomarker genes *TIGIT* and *TOX* have been associated with clinical progression of chronic L-HES to PTCL, supporting their roles in driving malignancy. As the transcriptome studies were of limited sample size, continued studies with additional L-HES patients and comparisons to other Th2-driven diseases like atopic dermatitis may be helpful. Further studies of the functions of these genes in proliferation and malignancy will be important in understanding how these genes contribute to SS.

## MATERIALS AND METHODS

### Patients

L-HES patient characteristics, T cell enrichment, stimulation method, and microarray experiments were reported in detail by Ravoet, *et al.* [12], and are briefly summarized in Table 2. L-HES year 0 samples were used for all SS and L-HES comparisons, unless otherwise noted. L-HES patient 1 (LP1) was followed for 6 years, and samples from year 0 and year 4 represent chronic L-HES. LP1 was diagnosed in year 6 of follow-up with type 4 peripheral diffuse T lymphoma of small to medium lymphocytes [52].

Diagnosis of SS was based on World Health Organization-European Organization for Research and Treatment of Cancer staging and classification criteria [53]. All SS patients presented with an absolute Sézary cell count of at least 1,000 cells/mm<sup>3</sup> at the time of diagnosis [54]. Two cohorts of patients diagnosed with SS were included in this study (Table 1). Cohort 1 was recruited between 2002–2005, under a research protocol approved by the Institutional Review Board of Henry Ford Hospital (Detroit, MI). The three patients represented in microarray experiments had a mean absolute Sézary cell count of 5,527 ± 929 cells/mm<sup>3</sup>. An independent group of 10 additional SS patients from cohort 1 was used for validation of SS gene expression in Figure 3. SS patients donated whole blood obtained by venipuncture. ND leucocytes were obtained from pheresis collars (*n* = 11, American Red Cross, Detroit, MI). Cohort 2 was recruited after January 2016, under a research protocol approved



by the Institutional Review Board of the University of Arkansas for Medical Sciences (Little Rock, AR). PBMCs from six SS patients and one L-HES patient were used for the validation of gene expression in Figure 5. ND PBMCs were isolated from leucoreduction chambers ( $n = 6$ , Arkansas Blood Institute, Little Rock, AR). Diagnosis of L-HES was based on current criteria [11, 55]. This L-HES patient, a 73-year old black female, presented with generalized erythroderma and severe pruritis. The peripheral absolute cell counts were  $2.6 \times 10^9/L$  for eosinophils and  $12.6 \times 10^9/L$  for lymphocytes, and serum IgE was 3908 kU/L. Flow cytometry detected an abnormal population of CD3-CD4<sup>+</sup> T cells in the peripheral blood (40% of total events) and bone marrow (23% of total events) that were heterogeneous for CD7. Bone marrow was positive for clonal T cell receptor gamma and beta rearrangements, but negative for cytogenetic abnormalities and gene rearrangements.

## Cells and treatments

Peripheral blood mononuclear cells (PBMC) were isolated from whole blood, pheresis collars, or leucoreduction chambers by density centrifugation using Ficoll [56]. We previously published Affymetrix HG U133 Plus2 microarray profiles of CD45RO<sup>+</sup> (memory) and CD45RA<sup>+</sup> (naïve) CD4<sup>+</sup> T cells from healthy donors ( $n = 3$  each) [26]. CD4<sup>+</sup>CD45RO<sup>+</sup> T cells from SS patients ( $n = 3$ ) described in the present report were isolated at the same time, and using the same methods, as described by Chong, *et al* [26]. Purified CD4<sup>+</sup>CD45RO<sup>+</sup> T cells and PBMCs from SS and ND were stimulated with phorbol-12-myristate13-acetate (PMA) and A23187 ionophore (Calbiochem/Sigma), and then cultured for 2 and 6 hours, as described by Chong, *et al*. [26].

## Microarrays

Affymetrix HG U133 Plus 2 microarrays with 1.3 million probes covering 47 k transcripts were used. RNA purification, library preparation, and microarray hybridization was performed as described in Chong, *et al*. [26]. All activation time points (0, 2, 6 hours) are represented by three SS patients and three ND, except for the 6 hour time point, for which only two SS samples were available (SS1 and SS3, Figure 1). One microarray was used for each sample.

## RT-qPCR

Samples from 10-11 ND and 8-10 SS from Cohort 1 were used in Figure 3. Total RNA from PBMC was purified, reverse transcribed, and subjected to RT-qPCR as described previously [27]. Samples from 6 ND and 6 SS from Cohort 2 were used in Figure 5. Total RNA from PBMC was purified using RNeasy Plus kits (Qiagen), quantified by spectrophotometry at 260 nm

and 280 nm, and reverse transcribed using VeriScript or Maxima kits (Life Technologies). RT-qPCR reactions were performed in triplicate using VeriQuest or Maxima SYBR Green qPCR master mixes (Life Technologies), on Applied Biosystems 7500 or QuantStudio 5 Real Time PCR Systems.  $\beta$ 2-microglobulin mRNA expression was used for normalization of CT values. Primer sequences are provided in the Supplementary Table 6. Relative quantification of gene expression between SS and ND employed the  $2^{-\Delta\Delta CT}$  method [57]. Statistical analysis was performed with GraphPad Prism 8.0 software. For SS vs. ND, log<sub>2</sub> transformed data was analyzed by 2-way repeated measures ANOVA with Sidak's post test for multiple comparisons and  $\alpha = 0.05$ . Gene expression for the single L-HES patient was considered differentially expressed if it differed by more than 2 standard deviations of the mean for ND or SS samples, depicted by 95% confidence intervals in Figure 5.

## Microarray data analysis

L-HES gene expression data based on Affymetrix HG U133 Plus 2 microarrays from Ravoet, *et al*. [12] was obtained from the Gene Expression Omnibus (<https://www.ncbi.nlm.nih.gov/geo/>) using accession number GSE12079. While several microarray studies for SS have been published [13, 16, 17, 58, 59], no other data set using the Affymetrix HG U133 Plus 2.0 platform is publicly available. The work flow for raw data processing, quality control measures, and analysis is summarized in the Supplementary Figure 2. Data analysis was performed in R version 3.4 (<https://www.R-project.org/>) using packages from Bioconductor (<http://www.bioconductor.org/>). Quality control checks on all Affymetrix CEL files from our laboratory and the downloaded CEL files were performed using arrayQualityMetrics [60]. One replicate of L-HES patient 3 (GSM304966) did not pass quality control and was excluded. CEL files that passed the quality control checks were background corrected and normalized using the frozen robust multiarray analysis (fRMA) [61]. fRMA performs well when microarray data is preprocessed individually or in small batches because quantile normalization is performed using a reference distribution created from a training database of 850 biologically diverse samples from public repositories. After normalization, probe-sets were assigned to Entrez genome annotations using the method from Dai, *et al*. [62]. ComBat [63] was used to correct a batch effect in the SS data set (Supplementary Figure 2) created by processing samples for two subjects (SS3, ND3) separately from the others. Control probes were filtered out from the expression data using geneFilter [64]. Ravoet, *et al*. [12] used single microarrays for ND samples and 2–3 microarray replicates for L-HES samples. We averaged replicate signal intensities prior to determining fold changes. Probes differentially expressed

between cases and controls, or between stimulated and unstimulated conditions were identified using RankProd [65, 66]. The threshold for differential expression was  $\log_2FC \geq |1|$ , and percentage of false prediction (pfp)  $< 0.05$ . Genes differentially expressed in both SS and L-HES were identified using GeneVenn [67]. Biological process enrichment was estimated using the Molecular Signatures Database (MSigDB) [36] hypergeometric overlap tool with the Hallmark gene set collection.

## Abbreviations

CTCL: cutaneous T cell lymphoma; DEG: differentially expressed gene; L-HES: lymphocytic-variant hypereosinophilic syndrome; LP1: L-HES patient 1; ND: normal donor; PBMC: peripheral blood mononuclear cell; PTCL: peripheral T cell lymphoma; SS: Sézary syndrome.

## Author contributions

AMH and HKW conceived the research, designed experiments, and interpreted data. AMH, DA, and HKW wrote the manuscript. DA analyzed microarray data. AGB and AMH performed experiments and analyzed PCR data. AGB and SMB procured research samples. AGB and PCH reviewed the manuscript.

## CONFLICTS OF INTEREST

The authors declare no competing financial interests.

## FUNDING

This work was supported by the University of Arkansas for Medical Sciences, the Fund for Henry Ford Hospital, the Clarence Livingood Fund, the Dermatology Foundation Clinical Career Development Award, NIH NIAMS and grants from the Dr. Martin and Dorothy Spatz Charitable Foundation (HKW). The work was accepted for presentation at the 77th Annual Society of Investigative Dermatology Meeting.

## REFERENCES

1. Horna P, Moscinski LC, Sokol L, Shao H. Naïve/Memory T-Cell Phenotypes in Leukemic Cutaneous T-Cell Lymphoma: Putative Cell of Origin Overlaps Disease Classification. *Cytometry B Clin Cytom.* 2019; 96:234–241. <https://doi.org/10.1002/cyto.b.21738>. [PubMed]
2. Campbell JJ, Clark RA, Watanabe R, Kupper TS. Sezary syndrome and mycosis fungoides arise from distinct T-cell subsets: a biologic rationale for their distinct clinical behaviors. *Blood.* 2010; 116:767–771. <https://doi.org/10.1182/blood-2009-11-251926>. [PubMed]
3. Nebozhyn M, Loboda A, Kari L, Rook AH, Vonderheid EC, Lessin S, Berger C, Edelson R, Nichols C, Yousef M, Gudipati L, Shang M, Showe MK, Showe LC. Quantitative PCR on 5 genes reliably identifies CTCL patients with 5% to 99% circulating tumor cells with 90% accuracy. *Blood.* 2006; 107:3189–96. <https://doi.org/10.1182/blood-2005-07-2813>. [PubMed]
4. Litvinov IV, Netchiporouk E, Cordeiro B, Doré MA, Moreau L, Pehr K, Gilbert M, Zhou Y, Sasseville D, Kupper TS. The Use of Transcriptional Profiling to Improve Personalized Diagnosis and Management of Cutaneous T-cell Lymphoma (CTCL). *Clin Cancer Res.* 2015; 21:2820–29. <https://doi.org/10.1158/1078-0432.CCR-14-3322>. [PubMed]
5. Roufosse F, Garaud S, de Leval L. Lymphoproliferative disorders associated with hypereosinophilia. *Semin Hematol.* 2012; 49:138–48. <https://doi.org/10.1053/j.seminhematol.2012.01.003>. [PubMed]
6. Ogbogu PU, Bochner BS, Butterfield JH, Gleich GJ, Huss-Marp J, Kahn JE, Leiferman KM, Nutman TB, Pfab F, Ring J, Rothenberg ME, Roufosse F, Sajous MH, et al. Hypereosinophilic syndrome: a multicenter, retrospective analysis of clinical characteristics and response to therapy. *J Allergy Clin Immunol.* 2009; 124:1319–25.e3. <https://doi.org/10.1016/j.jaci.2009.09.022>. [PubMed]
7. Simon HU, Plötz SG, Dummer R, Blaser K. Abnormal clones of T cells producing interleukin-5 in idiopathic eosinophilia. *N Engl J Med.* 1999; 341:1112–20. <https://doi.org/10.1056/NEJM199910073411503>. [PubMed]
8. Roufosse F, Schandené L, Sibille C, Willard-Gallo K, Kennes B, Efra A, Goldman M, Cogan E. Clonal Th2 lymphocytes in patients with the idiopathic hypereosinophilic syndrome. *Br J Haematol.* 2000; 109:540–48. <https://doi.org/10.1046/j.1365-2141.2000.02097.x>. [PubMed]
9. Leiferman KM, Gleich GJ, Peters MS. Dermatologic manifestations of the hypereosinophilic syndromes. *Immunol Allergy Clin North Am.* 2007; 27:415–41. <https://doi.org/10.1016/j.iac.2007.07.009>. [PubMed]
10. Lefèvre G, Copin MC, Roumier C, Aubert H, Avenel-Audran M, Gardel N, Poulain S, Staumont-Sallé D, Seneschal J, Salles G, Ghomari K, Terriou L, Leclech C, et al, and French Eosinophil Network. CD3-CD4+ lymphoid variant of hypereosinophilic syndrome: nodal and extranodal histopathological and immunophenotypic features of a peripheral indolent clonal T-cell lymphoproliferative disorder. *Haematologica.* 2015; 100:1086–95. <https://doi.org/10.3324/haematol.2014.118042>. [PubMed]
11. Roufosse F, Cogan E, Goldman M. Lymphocytic-variant hypereosinophilic syndrome. *Immunol Allergy Clin North Am.* 2007; 27:389–413. <https://doi.org/10.1016/j.iac.2007.07.002>. [PubMed]
12. Ravoet M, Sibille C, Gu C, Libin M, Haibe-Kains B, Sotiriou C, Goldman M, Roufosse F, Willard-Gallo K. Molecular profiling of CD3-CD4+ T cells from patients

- with the lymphocytic variant of hypereosinophilic syndrome reveals targeting of growth control pathways. *Blood*. 2009; 114:2969–83. <https://doi.org/10.1182/blood-2008-08-175091>. [PubMed]
13. Kari L, Loboda A, Nebozhyn M, Rook AH, Vonderheid EC, Nichols C, Virok D, Chang C, Horng WH, Johnston J, Wysocka M, Showe MK, Showe LC. Classification and prediction of survival in patients with the leukemic phase of cutaneous T cell lymphoma. *J Exp Med*. 2003; 197:1477–88. <https://doi.org/10.1084/jem.20021726>. [PubMed]
  14. Su MW, Dorocicz I, Dragowska WH, Ho V, Li G, Voss N, Gascoyne R, Zhou Y. Aberrant expression of T-plastin in Sezary cells. *Cancer Res*. 2003; 63:7122–27. [PubMed]
  15. van Doorn R, Dijkman R, Vermeer MH, Out-Luiting JJ, van der Raaij-Helmer EM, Willemze R, Tensen CP. Aberrant expression of the tyrosine kinase receptor EphA4 and the transcription factor twist in Sézary syndrome identified by gene expression analysis. *Cancer Res*. 2004; 64:5578–86. <https://doi.org/10.1158/0008-5472.CAN-04-1253>. [PubMed]
  16. Booken N, Gratchev A, Utikal J, Weiss C, Yu X, Qadoumi M, Schmuth M, Sepp N, Nashan D, Rass K, Tuting T, Assaf C, Dippel E, et al. Sezary syndrome is a unique cutaneous T-cell lymphoma as identified by an expanded gene signature including diagnostic marker molecules CDO1 and DNMT3. *Leukemia*. 2008; 22:393–9. <https://doi.org/10.1038/sj.leu.2405044>. [PubMed]
  17. Wang Y, Su M, Zhou LL, Tu P, Zhang X, Jiang X, Zhou Y. Deficiency of SATB1 expression in Sezary cells causes apoptosis resistance by regulating FasL/CD95L transcription. *Blood*. 2011; 117:3826–35. <https://doi.org/10.1182/blood-2010-07-294819>. [PubMed]
  18. Lee CS, Ungewickell A, Bhaduri A, Qu K, Webster DE, Armstrong R, Weng WK, Aros CJ, Mah A, Chen RO, Lin M, Sundram U, Chang HY, et al. Transcriptome sequencing in Sezary syndrome identifies Sezary cell and mycosis fungoides-associated lncRNAs and novel transcripts. *Blood*. 2012; 120:3288–97. <https://doi.org/10.1182/blood-2012-04-423061>. [PubMed]
  19. Boonk SE, Zoutman WH, Marie-Cardine A, van der Fits L, Out-Luiting JJ, Mitchell TJ, Tosi I, Morris SL, Moriarty B, Booken N, Felcht M, Quaglino P, Ponti R, et al. Evaluation of Immunophenotypic and Molecular Biomarkers for Sézary Syndrome Using Standard Operating Procedures: A Multicenter Study of 59 Patients. *J Invest Dermatol*. 2016; 136:1364–72. <https://doi.org/10.1016/j.jid.2016.01.038>. [PubMed]
  20. Hahtola S, Tuomela S, Elo L, Häkkinen T, Karenko L, Nedoszytko B, Heikkilä H, Saarialho-Kere U, Roszkiewicz J, Aittokallio T, Lahesmaa R, Ranki A. Th1 response and cytotoxicity genes are down-regulated in cutaneous T-cell lymphoma. *Clin Cancer Res*. 2006; 12:4812–21. <https://doi.org/10.1158/1078-0432.CCR-06-0532>. [PubMed]
  21. Fanok MH, Sun A, Fogli LK, Narendran V, Eckstein M, Kannan K, Dolgalev I, Lazaris C, Heguy A, Laird ME, Sundrud MS, Liu C, Kutok J, et al. Role of Dysregulated Cytokine Signaling and Bacterial Triggers in the Pathogenesis of Cutaneous T-Cell Lymphoma. *J Invest Dermatol*. 2018; 138:1116–25. <https://doi.org/10.1016/j.jid.2017.10.028>. [PubMed]
  22. Benoit BM, Jariwala N, O'Connor G, Oetjen LK, Whelan TM, Werth A, Troxel AB, Sicard H, Zhu L, Miller C, Takeshita J, McVicar DW, Kim BS, et al. CD164 identifies CD4+ T cells highly expressing genes associated with malignancy in Sézary syndrome: the Sézary signature genes, FCRL3, Tox, and miR-214. *Arch Dermatol Res*. 2017; 309:11–19. <https://doi.org/10.1007/s00403-016-1698-8>. [PubMed]
  23. Wang L, Ni X, Covington KR, Yang BY, Shiu J, Zhang X, Xi L, Meng Q, Langridge T, Drummond J, Donehower LA, Doddapaneni H, Muzny DM, et al. Genomic profiling of Sézary syndrome identifies alterations of key T cell signaling and differentiation genes. *Nat Genet*. 2015; 47:1426–34. <https://doi.org/10.1038/ng.3444>. [PubMed]
  24. Chen SC, Liao TT, Yang MH. Emerging roles of epithelial-mesenchymal transition in hematological malignancies. *J Biomed Sci*. 2018; 25:37. <https://doi.org/10.1186/s12929-018-0440-6>. [PubMed]
  25. Huang Y, Su MW, Jiang X, Zhou Y. Evidence of an oncogenic role of aberrant TOX activation in cutaneous T-cell lymphoma. *Blood*. 2015; 125:1435–43. <https://doi.org/10.1182/blood-2014-05-571778>. [PubMed]
  26. Chong BF, Dantzer P, Germeroth T, Hafner M, Wilson AJ, Xiao G, Wong HK. Induced Sezary syndrome PBMCs poorly express immune response genes up-regulated in stimulated memory T cells. *J Dermatol Sci*. 2010; 60:8–20. <https://doi.org/10.1016/j.jdermsci.2010.07.007>. [PubMed]
  27. Chong BF, Wilson AJ, Gibson HM, Hafner MS, Luo Y, Hedgcock CJ, Wong HK. Immune function abnormalities in peripheral blood mononuclear cell cytokine expression differentiates stages of cutaneous T-cell lymphoma/mycosis fungoides. *Clin Cancer Res*. 2008; 14:646–53. <https://doi.org/10.1158/1078-0432.CCR-07-0610>. [PubMed]
  28. Walker S, Wang C, Walradt T, Hong BS, Tanner JR, Levinsohn JL, Goh G, Subtil A, Lessin SR, Heymann WR, Vonderheid EC, King BA, Lifton RP, Choi J. Identification of a gain-of-function STAT3 mutation (p.Y640F) in lymphocytic-variant hypereosinophilic syndrome. *Blood*. 2016; 127:948–51. <https://doi.org/10.1182/blood-2015-06-654277>. [PubMed]
  29. Dulmage B, Geskin L, Guitart J, Akilov OE. The biomarker landscape in mycosis fungoides and Sézary syndrome. *Exp Dermatol*. 2017; 26:668–76. <https://doi.org/10.1111/exd.13261>. [PubMed]
  30. Jariwala N, Benoit B, Kossenkov AV, Oetjen LK, Whelan TM, Cornejo CM, Takeshita J, Kim BS, Showe LC, Wysocka M, Rook AH. TIGIT and Helios Are Highly Expressed on CD4+ T Cells in Sézary Syndrome Patients. *J Invest Dermatol*. 2017; 137:257–60. <https://doi.org/10.1016/j.jid.2016.08.016>. [PubMed]
  31. Wysocka M, Kossenkov AV, Benoit BM, Troxel AB, Singer E, Schaffer A, Kim B, Dentshev T, Nagata S, Ise T, Showe



- LC, Rook AH. CD164 and FCRL3 are highly expressed on CD4+CD26- T cells in Sézary syndrome patients. *J Invest Dermatol.* 2014; 134:229–36. <https://doi.org/10.1038/jid.2013.279>. [PubMed]
32. Dereure O, Portales P, Clot J, Guilhou JJ. Decreased expression of Fas (APO-1/CD95) on peripheral blood CD4+ T lymphocytes in cutaneous T-cell lymphomas. *Br J Dermatol.* 2000; 143:1205–10. <https://doi.org/10.1046/j.1365-2133.2000.03889.x>. [PubMed]
  33. Diehn M, Alizadeh AA, Rando OJ, Liu CL, Stankunas K, Botstein D, Crabtree GR, Brown PO. Genomic expression programs and the integration of the CD28 costimulatory signal in T cell activation. *Proc Natl Acad Sci U S A.* 2002; 99:11796–801. <https://doi.org/10.1073/pnas.092284399>. [PubMed]
  34. Sotsios Y, Blair PJ, Westwick J, Ward SG. Disparate effects of phorbol esters, CD3 and the costimulatory receptors CD2 and CD28 on RANTES secretion by human T lymphocytes. *Immunology.* 2000; 101:30–37. <https://doi.org/10.1046/j.1365-2567.2000.00072.x>. [PubMed]
  35. Liberzon A, Birger C, Thorvaldsdóttir H, Ghandi M, Mesirov JP, Tamayo P. The Molecular Signatures Database (MSigDB) hallmark gene set collection. *Cell Syst.* 2015; 1:417–25. <https://doi.org/10.1016/j.cels.2015.12.004>. [PubMed]
  36. Liberzon A, Subramanian A, Pinchback R, Thorvaldsdóttir H, Tamayo P, Mesirov JP. Molecular signatures database (MSigDB) 3.0. *Bioinformatics.* 2011; 27:1739–40. <https://doi.org/10.1093/bioinformatics/btr260>. [PubMed]
  37. Begue E, Jean-Louis F, Bagot M, Jauliac S, Cayuela JM, Laroche L, Parquet N, Bachelez H, Bensussan A, Courtois G, Michel L. Inducible expression and pathophysiologic functions of T-plastin in cutaneous T-cell lymphoma. *Blood.* 2012; 120:143–54. <https://doi.org/10.1182/blood-2011-09-379156>. [PubMed]
  38. Gu C, Yao J, Sun P. Dynamin 3 suppresses growth and induces apoptosis of hepatocellular carcinoma cells by activating inducible nitric oxide synthase production. *Oncol Lett.* 2017; 13:4776–84. <https://doi.org/10.3892/ol.2017.6057>. [PubMed]
  39. Zhang Z, Chen C, Guo W, Zheng S, Sun Z, Geng X. DNMT3 Attenuates Hepatocellular Carcinoma Growth by Activating P53. *Med Sci Monit.* 2016; 22:197–205. <https://doi.org/10.12659/MSM.896545>. [PubMed]
  40. Duvic M, Pinter-Brown LC, Foss FM, Sokol L, Jorgensen JL, Challagundla P, Dwyer KM, Zhang X, Kurman MR, Ballerini R, Liu L, Kim YH. Phase 1/2 study of mogamulizumab, a defucosylated anti-CCR4 antibody, in previously treated patients with cutaneous T-cell lymphoma. *Blood.* 2015; 125:1883–89. <https://doi.org/10.1182/blood-2014-09-600924>. [PubMed]
  41. Osthus RC, Karim B, Prescott JE, Smith BD, McDevitt M, Huso DL, Dang CV. The Myc target gene JPO1/CDCA7 is frequently overexpressed in human tumors and has limited transforming activity *in vivo*. *Cancer Res.* 2005; 65:5620–27. <https://doi.org/10.1158/0008-5472.CAN-05-0536>. [PubMed]
  42. Huang A, Ho CS, Ponzielli R, Barsyte-Lovejoy D, Bouffet E, Picard D, Hawkins CE, Penn LZ. Identification of a novel c-Myc protein interactor, JPO2, with transforming activity in medulloblastoma cells. *Cancer Res.* 2005; 65:5607–19. <https://doi.org/10.1158/0008-5472.CAN-05-0500>. [PubMed]
  43. Ellis BC, Molloy PL, Graham LD. CRNDE: A Long Non-Coding RNA Involved in Cancer, Neurobiology, and DEvelopment. *Front Genet.* 2012; 3:270. <https://doi.org/10.3389/fgene.2012.00270>. [PubMed]
  44. Fredholm S, Willerslev-Olsen A, Met Ö, Kubat L, Gluud M, Mathiasen SL, Friese C, Blümel E, Petersen DL, Hu T, Nastasi C, Lindahl LM, Buus TB, et al. SATB1 in Malignant T Cells. *J Invest Dermatol.* 2018; 138:1805–15. <https://doi.org/10.1016/j.jid.2018.03.1526>. [PubMed]
  45. Narducci MG, Arcelli D, Picchio MC, Lazzeri C, Pagani E, Sampogna F, Scala E, Fadda P, Cristoforetti C, Facchiano A, Frontani M, Monopoli A, Ferracin M, et al. MicroRNA profiling reveals that miR-21, miR486 and miR-214 are upregulated and involved in cell survival in Sézary syndrome. *Cell Death Dis.* 2011; 2:e151. <https://doi.org/10.1038/cddis.2011.32>. [PubMed]
  46. Contassot E, Kerl K, Roques S, Shane R, Gaide O, Dupuis M, Rook AH, French LE. Resistance to FasL and tumor necrosis factor-related apoptosis-inducing ligand-mediated apoptosis in Sezary syndrome T-cells associated with impaired death receptor and FLICE-inhibitory protein expression. *Blood.* 2008; 111:4780–87. <https://doi.org/10.1182/blood-2007-08-109074>. [PubMed]
  47. Klemke CD, Brenner D, Weiss EM, Schmidt M, Leverkus M, Gülow K, Krammer PH. Lack of T-cell receptor-induced signaling is crucial for CD95 ligand up-regulation and protects cutaneous T-cell lymphoma cells from activation-induced cell death. *Cancer Res.* 2009; 69:4175–83. <https://doi.org/10.1158/0008-5472.CAN-08-4631>. [PubMed]
  48. Wong HK, Mishra A, Hake T, Porcu P. Evolving insights in the pathogenesis and therapy of cutaneous T-cell lymphoma (mycosis fungoides and Sezary syndrome). *Br J Haematol.* 2011; 155:150–66. <https://doi.org/10.1111/j.1365-2141.2011.08852.x>. [PubMed]
  49. Zhang Y, Wang Y, Yu R, Huang Y, Su M, Xiao C, Martinka M, Dutz JP, Zhang X, Zheng Z, Zhou Y. Molecular markers of early-stage mycosis fungoides. *J Invest Dermatol.* 2012; 132:1698–706. <https://doi.org/10.1038/jid.2012.13>. [PubMed]
  50. Lefrançois P, Xie P, Wang L, Tetzlaff MT, Moreau L, Watters AK, Netchiporouk E, Provost N, Gilbert M, Ni X, Sasseville D, Wheeler DA, Duvic M, Litvinov IV. Gene expression profiling and immune cell-type deconvolution highlight robust disease progression and survival markers in multiple cohorts of CTCL patients. *Oncoimmunology.* 2018; 7:e1467856. <https://doi.org/10.1080/2162402X.2018.1467856>. [PubMed]

51. Schrader AM, Jansen PM, Willemze R. TOX expression in cutaneous T-cell lymphomas: an adjunctive diagnostic marker that is not tumour specific and not restricted to the CD4(+) CD8(-) phenotype. *Br J Dermatol*. 2016; 175:382–86. <https://doi.org/10.1111/bjd.14508>. [PubMed]
52. Ravoet M, Sibille C, Roufousse F, Duvillier H, Sotiriou C, Schandené L, Martiat P, Goldman M, Willard-Gallo KE. 6q- is an early and persistent chromosomal aberration in CD3-CD4+ T-cell clones associated with the lymphocytic variant of hypereosinophilic syndrome. *Haematologica*. 2005; 90:753–65. [PubMed]
53. Willemze R, Jaffe ES, Burg G, Cerroni L, Berti E, Swerdlow SH, Ralfkiaer E, Chimenti S, Diaz-Perez JL, Duncan LM, Grange F, Harris NL, Kempf W, et al. WHO-EORTC classification for cutaneous lymphomas. *Blood*. 2005; 105:3768–85. <https://doi.org/10.1182/blood-2004-09-3502>. [PubMed]
54. Vonderheid EC, Bernengo MG. The Sézary syndrome: hematologic criteria. *Hematol Oncol Clin North Am*. 2003; 17:1367–89, viii. [https://doi.org/10.1016/S0889-8588\(03\)00120-5](https://doi.org/10.1016/S0889-8588(03)00120-5). [PubMed]
55. Klion AD, Bochner BS, Gleich GJ, Nutman TB, Rothenberg ME, Simon HU, Wechsler ME, Weller PF, and The Hypereosinophilic Syndromes Working Group. Approaches to the treatment of hypereosinophilic syndromes: a workshop summary report. *J Allergy Clin Immunol*. 2006; 117:1292–302. <https://doi.org/10.1016/j.jaci.2006.02.042>. [PubMed]
56. Wong HK, Kammer GM, Dennis G, Tsokos GC. Abnormal NF-kappa B activity in T lymphocytes from patients with systemic lupus erythematosus is associated with decreased p65-RelA protein expression. *J Immunol*. 1999; 163:1682–89. [PubMed]
57. Livak KJ, Schmittgen TD. Analysis of relative gene expression data using real-time quantitative PCR and the 2(-Delta Delta C(T)) Method. *Methods*. 2001; 25:402–08. <https://doi.org/10.1006/meth.2001.1262>. [PubMed]
58. Caprini E, Cristofolletti C, Arcelli D, Fadda P, Citterich MH, Sampogna F, Magrelli A, Censi F, Torrieri P, Frontani M, Scala E, Picchio MC, Temperani P, et al. Identification of key regions and genes important in the pathogenesis of sezary syndrome by combining genomic and expression microarrays. *Cancer Res*. 2009; 69:8438–46. <https://doi.org/10.1158/0008-5472.CAN-09-2367>. [PubMed]
59. Wang T, Lu Y, Polk A, Chowdhury P, Murga-Zamalloa C, Fujiwara H, Suemori K, Beyersdorf N, Hristov AC, Lim MS, Bailey NG, Wilcox RA. T-cell Receptor Signaling Activates an ITK/NF-κB/GATA-3 axis in T-cell Lymphomas Facilitating Resistance to Chemotherapy. *Clin Cancer Res*. 2017; 23:2506–15. <https://doi.org/10.1158/1078-0432.CCR-16-1996>. [PubMed]
60. Kauffmann A, Gentleman R, Huber W. array QualityMetrics—a bioconductor package for quality assessment of microarray data. *Bioinformatics*. 2009; 25:415–16. <https://doi.org/10.1093/bioinformatics/btn647>. [PubMed]
61. McCall MN, Bolstad BM, Irizarry RA. Frozen robust multiarray analysis (fRMA). *Biostatistics*. 2010; 11:242–53. <https://doi.org/10.1093/biostatistics/kxp059>. [PubMed]
62. Dai M, Wang P, Boyd AD, Kostov G, Athey B, Jones EG, Bunney WE, Myers RM, Speed TP, Akil H, Watson SJ, Meng F. Evolving gene/transcript definitions significantly alter the interpretation of GeneChip data. *Nucleic Acids Res*. 2005; 33:e175. <https://doi.org/10.1093/nar/gni179>. [PubMed]
63. Johnson WE, Li C, Rabinovic A. Adjusting batch effects in microarray expression data using empirical Bayes methods. *Biostatistics*. 2007; 8:118–27. <https://doi.org/10.1093/biostatistics/kxj037>. [PubMed]
64. Gentleman R, Carey V, Huber W, Hahne F. (2017). genefilter: genefilter: methods for filtering genes from high-throughput experiments. R package version 1.60.0. <https://bioconductor.statistik.tu-dortmund.de/packages/3.6/bioc/html/genefilter.html>.
65. Del Carratore F, Jankevics A, Eisinga R, Heskes T, Hong F, Breitling R. RankProd 2.0: a refactored bioconductor package for detecting differentially expressed features in molecular profiling datasets. *Bioinformatics*. 2017; 33:2774–75. <https://doi.org/10.1093/bioinformatics/btx292>. [PubMed]
66. Hong F, Breitling R, McEntee CW, Wittner BS, Nemhauser JL, Chory J. RankProd: a bioconductor package for detecting differentially expressed genes in meta-analysis. *Bioinformatics*. 2006; 22:2825–27. <https://doi.org/10.1093/bioinformatics/btl476>. [PubMed]
67. Pirooznia M, Nagarajan V, Deng Y. GeneVenn - A web application for comparing gene lists using Venn diagrams. *Bioinformation*. 2007; 1:420–22. <https://doi.org/10.6026/97320630001420>. [PubMed]
68. Qu K, Zaba LC, Satpathy AT, Giresi PG, Li R, Jin Y, Armstrong R, Jin C, Schmitt N, Rahbar Z, Ueno H, Greenleaf WJ, Kim YH, et al. Chromatin Accessibility Landscape of Cutaneous T Cell Lymphoma and Dynamic Response to HDAC Inhibitors. *Cancer Cell*. 2017; 32:27–41. e4. <https://doi.org/10.1016/j.ccell.2017.05.008>. [PubMed]
69. Picchio MC, Scala E, Pomponi D, Caprini E, Frontani M, Angelucci I, Mangoni A, Lazzeri C, Perez M, Remotti D, Bonoldi E, Benucci R, Baliva G, et al. CXCL13 is highly produced by Sézary cells and enhances their migratory ability via a synergistic mechanism involving CCL19 and CCL21 chemokines. *Cancer Res*. 2008; 68:7137–46. <https://doi.org/10.1158/0008-5472.CAN-08-0602>. [PubMed]
70. Wong HK, Gibson H, Hake T, Geyer S, Frederickson J, Marcucci G, Caligiuri MA, Porcu P, Mishra A. Promoter-Specific Hypomethylation Is Associated with Overexpression of PLS3, GATA6, and TWIST1 in the Sezary Syndrome. *J Invest Dermatol*. 2015; 135:2084–92. <https://doi.org/10.1038/jid.2015.116>. [PubMed]
71. Kamijo H, Miyagaki T, Shishido-Takahashi N, Nakajima R, Oka T, Suga H, Sugaya M, Sato S. Aberrant CD137 ligand expression induced by GATA6 overexpression promotes tumor progression in cutaneous T-cell lymphoma. *Blood*. 2018; 132:1922–35. <https://doi.org/10.1182/blood-2018-04-845834>. [PubMed]
